# Supplementary material for: Synthesis, properties and chemical modification of a persistent triisopropylsilylethynyl substituted tri(9-anthryl)methyl radical
Source: Royal Society of Chemistry journal article supplement (doi:10.1039/d2cc00548d), 2022-01-01
Supplement: d2cc00548d2.pdf [file d2cc00548d2.pdf]

## Electronic Supplementary Information (ESI)

### **Synthesis, Properties and Chemical Modification of a Persistent Triisopropylsilylethynyl Substituted Tri(9-anthryl)methyl Radical**

Tomohiko Nishiuchi,<sup>a,b\*</sup> Daisuke Ishii,<sup>a</sup> Seito Aibara,<sup>a</sup> Hiroyasu Sato,<sup>c</sup> and Takashi Kubo<sup>a,b\*</sup>

[a] Department of Chemistry, Graduate School of Science, Osaka University, Machikaneyama 1-1, Toyonaka, Osaka 560-0043, Japan. E-mail: nishiuchit13@chem.sci.osaka-u.ac.jp

[b] Innovative Catalysis Science Division, Institute for Open and Transdisciplinary Research Initiatives, (ICS-OTRI), Osaka University, Suita, Osaka 565-0871, Japan.

[c] Rigaku Corporation, 3-9-12 Matsubara, Akishima, Tokyo 196-8666, Japan



## General information

All experiments with moisture- or air-sensitive compounds were performed in anhydrous solvents under nitrogen atmosphere in well-dried glassware. Dried solvents (THF and dichloromethane) were purchased from KANTO CHEMICAL. Column chromatography was performed with silica gel [Silica gel 60N (KANTO CHEMICAL)].  $^1\text{H}$  and  $^{13}\text{C}$  NMR spectra were recorded on JEOL lambda-500 spectrometer or Bruker AVANCE NEO 700 spectrometer. Positive EI mass spectra were taken by using Shimadzu QP-5050. MALDI TOF MS spectra were taken by KRATOS AXIMA-PERFORMANCE (Shimadzu). Dithranol was used for the matrix. APCI-MS spectra were recorded on a Bruker micrOTOF II spectrometer. Data collection for X-ray crystal analysis was performed on Rigaku XtaLAB Synergy Custom (Detector is Hypix-6000HE. Mo-K $\alpha$  ( $\lambda = 0.71069 \text{ \AA}$ )). The structure was solved with direct methods and refined with full-matrix least squares. The UV-vis spectra were recorded on JASCO V-570 spectrophotometer. IR spectra were recorded on FT/IR 6100 (Jasco) using attenuated total reflection method equipped with ZnSe prism.

**Computational Methods.** All DFT calculations were performed with the Gaussian 16 program. Structure optimization in both ground states were performed by (U)ωB97XD/6-31G\*\*. TD-DFT calculations of **1** were performed by a UB3LYP/6-31G\*\* method using optimized structures by ωB97XD/6-31G\*\* method.

## Synthesis

### Synthesis of compound **4**

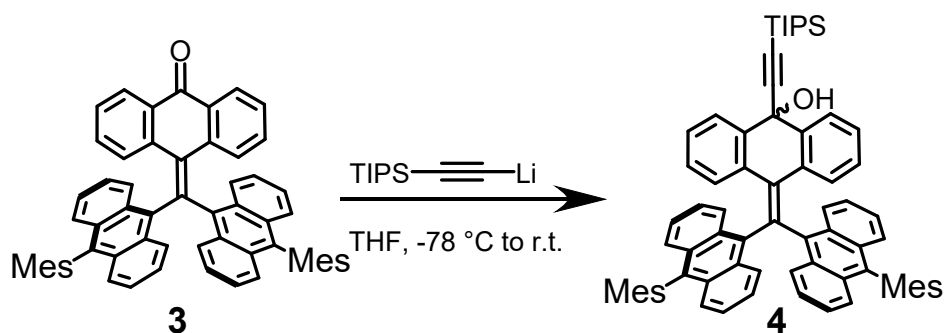

To a solution of triisopropylsilylacetylene (213 mg, 1.13 mmol) in THF (5 ml) was added *n*-BuLi (1.6 M hexane solution, 0.7 ml, 1.12 mmol) at -78 °C. After stirring for 30 min at same temperature, a solution of compound **3** (300 mg, 0.377 mmol) in THF (10 ml) was added and stirred for 1 day at room temperature. The reaction was quenched by water, extracted with dichloromethane, and washed with brine. After removal of the solvent *in vacuo*, the crude material was subjected to column chromatography on alumina (dichloromethane : hexane = 1 : 3) to afford the title compound **4** (338 mg, 0.345 mmol, 92% ) as yellow solid. Mp: 186 °C (dec.).  $^1\text{H}$  NMR (500 MHz,  $\text{CD}_2\text{Cl}_2$ )  $\delta$  8.97-8.95 (m, 2H, aromatic proton), 8.56 (d,  $J = 8.0$  Hz, 2H, aromatic proton), 8.28 (dd,  $J = 8.0$  Hz,  $J = 1.0$  Hz, 2H, aromatic proton), 7.48 (dd,  $J = 8.0$  Hz,  $J = 1.0$  Hz, 2H, aromatic proton), 7.45-7.42 (m, 2H, aromatic proton), 7.29-7.27 (dd,  $J = 7.5$  Hz,  $J = 1.0$  Hz, 2H, aromatic proton), 7.24-7.22 (m, 4H, aromatic proton), 7.14 (m, 2H, aromatic proton), 7.10-7.02 (m, 8H, aromatic proton), 6.60-6.57 (m, 2H, aromatic proton), 3.09 (s, 1H, OH), 2.41 (s, 6H,  $\text{CH}_3$ ), 1.72 (s, 6H,  $\text{CH}_3$ ), 1.43 (s, 6H,  $\text{CH}_3$ ), 1.25-1.16 (m, 21H,  $\text{SiCH}(\text{CH}_3)_2$ );  $^{13}\text{C}$  NMR (125 MHz,  $\text{CD}_2\text{Cl}_2$ )  $\delta$  141.91, 139.34, 138.11, 138.07, 137.66, 137.64, 137.47, 137.16, 136.36, 135.19, 133.85, 131.10, 130.33, 129.90, 128.76, 128.61, 128.58, 128.54, 128.47, 128.00, 127.95, 127.80, 127.32, 126.56, 126.51, 126.00, 125.46, 125.38, 109.67, 90.94, 71.64, 21.33, 19.94, 19.73, 18.93, 11.84. HR-MS (APCI) Calcd for  $\text{C}_{72}\text{H}_{68}\text{OSi}$  [( $M+\text{H}$ ) $^+$ ]:  $m/z$  977.5112, Found: 977.5095.

## Synthesis of compound 4'

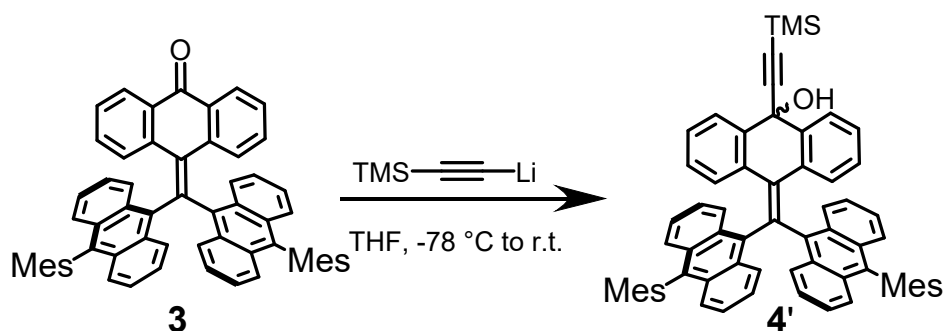

Compound 4' was prepared from 3 and trimethylsilylacetylene by using a similar procedure to that for 4 yielding 82 % as yellow solid. Mp: 170 °C (dec.). <sup>1</sup>H NMR (500 MHz, CD<sub>2</sub>Cl<sub>2</sub>) δ 8.89-8.87 (m, 2H, aromatic proton), 8.60 (d, *J* = 8.5 Hz, 2H, aromatic proton), 8.18 (d, *J* = 8.0 Hz, 2H, aromatic proton), 7.48 (d, *J* = 8.0 Hz, 2H, aromatic proton), 7.42-7.40 (m, 2H, aromatic proton), 7.29 (d, *J* = 8.0 Hz 2H, aromatic proton), 7.22-7.20 (m, 4H, aromatic proton), 7.15 (t, *J* = 7.5 Hz, 2H, aromatic proton), 7.11-7.05 (m, 6H, aromatic proton), 7.02 (s, 2H, aromatic proton) 6.59 (t, *J* = 7.8 Hz, 2H, aromatic proton), 3.09 (s, 1H, OH), 2.41 (s, 6H, CH<sub>3</sub>), 1.72 (s, 6H, CH<sub>3</sub>), 1.42 (s, 6H, CH<sub>3</sub>), 0.32 (s, 9H, SiCH<sub>3</sub>).; <sup>13</sup>C NMR (125 MHz, CD<sub>2</sub>Cl<sub>2</sub>) δ 141.39, 138.99, 137.91, 137.73, 137.34, 137.33, 137.16, 136.86, 135.78, 134.87, 133.10, 131.09, 129.96, 129.64, 128.40, 128.26, 128.22, 127.86, 127.81, 127.63, 127.47, 126.92, 126.28, 126.21, 125.70, 125.13, 125.04, 107.44, 93.71, 70.72, 21.01, 19.63, 19.40, -0.35. (One aromatic carbon signal is missing owing to duplicated in other carbon peaks.). HR-MS (APCI) Calcd for C<sub>61</sub>H<sub>47</sub>O [(*M*-C<sub>2</sub>SiMe<sub>3</sub>)<sup>+</sup>]: *m/z* 795.3621, Found: 795.3603. (Trimethylsilylethynyl unit was dissociated in the gas phase.).

## Synthesis of compound 1

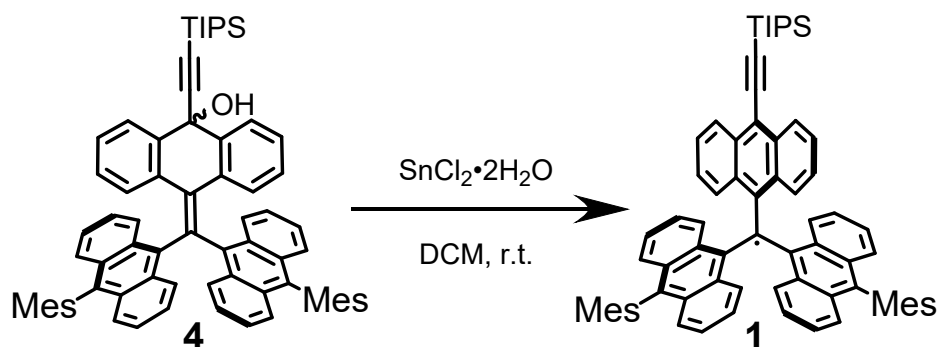

Compound 4 (335 mg, 0.343 mmol) and stannous chloride dihydrate (116 mg, 0.514 mmol) were dissolved in dichloromethane (15 ml) and stirred for 30 min at room temperature. The solution was directly subjected to column chromatography on deactivated silica gel (6% wt. water contain) (dichloromethane : hexane = 1 : 2) to afford the title compound 1 (295 mg, 0.307 mmol, 90% ) as deep blue solid. Recrystallization from dichloromethane and hexane gave a red-purple crystal. Mp: > 300 °C. HR-MS (APCI) Calcd for C<sub>72</sub>H<sub>67</sub>Si [*M*<sup>+</sup>]: *m/z* 959.5007, Found: 959.5008.

## Synthesis of compound 1' dimer

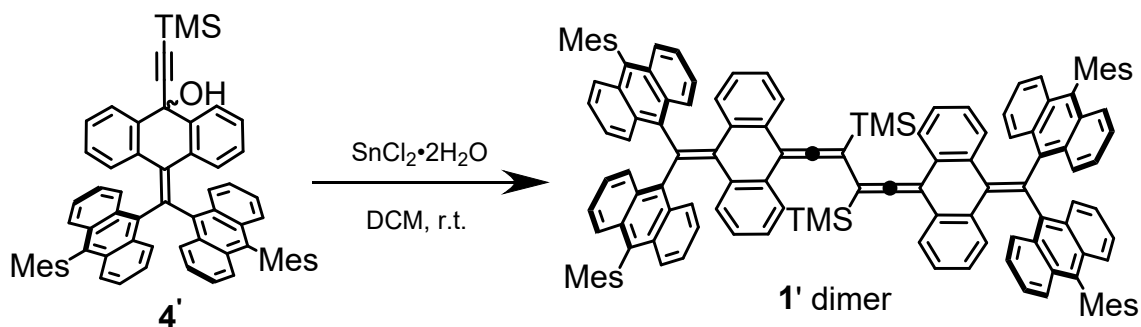

Compound **4'** (61.1 mg, 0.0684 mmol) and stannous chloride dihydrate (23.1 mg, 0.102 mmol) were dissolved in dichloromethane (15 ml) and stirred for 1 day at room temperature. Orange precipitation was filtered and washed with water to afford the title compound **1' dimer** (44.7 mg, 0.0255 mmol, 75%). Mp: 265 °C (dec.). <sup>1</sup>H NMR (700 MHz, CD<sub>2</sub>Cl<sub>2</sub>/CS<sub>2</sub>) δ 8.80-8.79 (m, 4H, aromatic proton), 8.39 (d, *J* = 9.1 Hz, 4H, aromatic proton), 7.53-7.52 (m, 4H, aromatic proton), 7.39-7.38 (m, 4H, aromatic proton), 7.21 (t, *J* = 9.5 Hz, 8H, aromatic proton), 7.16-7.14 (m, 8H, aromatic proton), 7.00-6.97 (m, 12H, aromatic proton), 6.91-6.89 (m, 4H, aromatic proton), 6.80-6.77 (m, 4H, aromatic proton), 6.34-6.32 (m, 4H, aromatic proton) 2.43 (s, 12H, CH<sub>3</sub>), 1.65 (s, 12H, CH<sub>3</sub>), 1.54 (s, 12H, CH<sub>3</sub>), 0.36 (s, 18H, SiCH<sub>3</sub>); <sup>13</sup>C NMR (176 MHz, CD<sub>2</sub>Cl<sub>2</sub>/CS<sub>2</sub>) δ 207.74, 143.79, 139.61, 137.35, 137.24, 137.08, 137.01, 135.06, 134.92, 134.28, 133.34, 131.47, 131.34, 129.97, 129.65, 129.18, 128.61, 128.56, 128.44, 127.67, 127.19, 126.65, 126.30, 126.06, 125.85, 125.79, 125.52, 125.30, 103.04, 102.78, 21.68, 20.01, 19.91, 0.30. (One aromatic carbon signal is missing owing to duplicated in other carbon peaks.). HR-MS (APCI) Calcd for C<sub>66</sub>H<sub>55</sub>Si [(1/2M+H)<sup>+</sup>]: *m/z* 876.4126, Found: 876.4123. (The dimer structure was dissociated into monomers in the gas phase.).

## Synthesis of compound 2

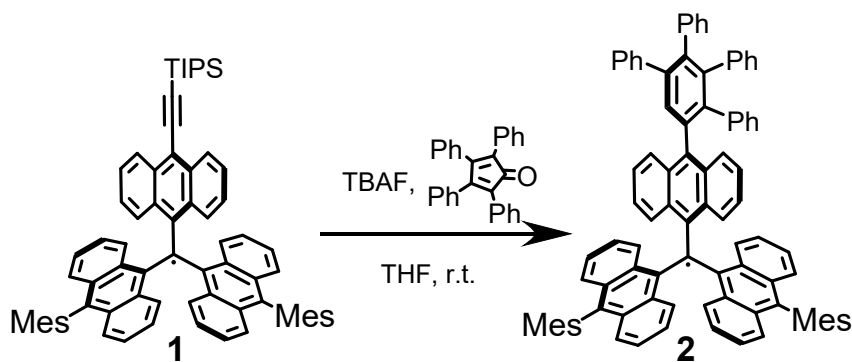

To a solution of **1** (30 mg, 0.031 mmol) and tetraphenylcyclopentadienone (12 mg, 0.031 mmol) in THF (5 ml) was added TBAF (1.0 M THF solution, 0.04 ml, 0.040 mmol) at room temperature. After stirring for 1 day, the reaction was quenched by water. Organic layer was extracted with dichloromethane and washed with brine. After removal of the solvent *in vacuo*, the crude material was subjected to column chromatography on silica gel (6% wt. water contain) (hexane : toluene = 1:1) to afford the title compound **2** (13 mg, 0.011 mmol, 37%) as blue solid. Recrystallization from chloroform and pentane gave a red-purple crystal. Mp: > 300 °C. HR-MS (APCI) Calcd for C<sub>91</sub>H<sub>67</sub> [(M+H)<sup>+</sup>]: *m/z* 1159.5237, Found: 1159.5232.

## X-ray crystallographic data of 1 and 2

**Crystal data for 1.** CCDC 2123624.  $C_{72}H_{67}Si$ ,  $M_W = 960.34$ , monoclinic, space group  $P 2_1/n$  (no. 14),  $a = 15.7578(7)$ ,  $b = 16.3981(5)$ ,  $c = 22.2474(8)$  Å,  $\beta = 109.503(4)^\circ$ ,  $V = 5418.8(4)$  Å<sup>3</sup>,  $Z = 4$ ,  $D = 1.177$  g cm<sup>3</sup>,  $T = 120$  K, Data collection with MoK $\alpha$  radiation (multi-layer mirror monochromated). 14510 measured reflection, 8404 unique reflections; structure solution by direct methods (Shelxs), refinement by fullmatrix least squares on  $F$  with anisotropic temperature factors for the non-H atoms. Final  $R_1 = 0.0644$ ,  $wR_2 = 0.1832$ ,  $GOF = 1.037$ .

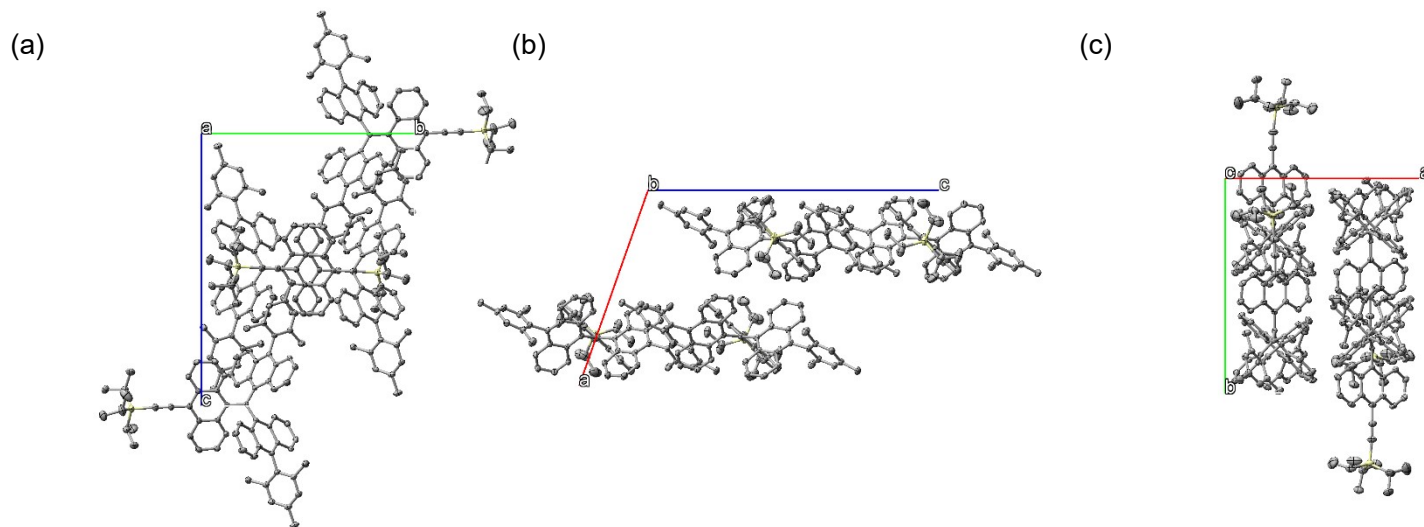

**Figure S1.** X-ray crystal structure of 1. Packing structures (a) from  $a$  axis, (b) from  $b$  axis, and (c) from  $c$  axis.

**Crystal data for 2.** CCDC 2123625.  $C_{91}H_{67}$ ,  $M_W = 1160.44$ , triclinic, space group  $P -1$  (no. 2),  $a = 15.4442(6)$ ,  $b = 16.8575(5)$ ,  $c = 17.7961(4)$  Å,  $\alpha = 63.340(3)^\circ$ ,  $\beta = 70.016(3)^\circ$ ,  $\gamma = 86.686(3)^\circ$ ,  $V = 3866.1(2)$  Å<sup>3</sup>,  $Z = 2$ ,  $D = 0.997$  g cm<sup>3</sup>,  $T = 120$  K, Data collection with MoK $\alpha$  radiation (multi-layer mirror monochromated). 19675 measured reflection, 12823 unique reflections; structure solution by direct methods (Shelxs), refinement by fullmatrix least squares on  $F$  with anisotropic temperature factors for the non-H atoms. Final  $R_1 = 0.0633$ ,  $wR_2 = 0.1855$ ,  $GOF = 0.981$ .

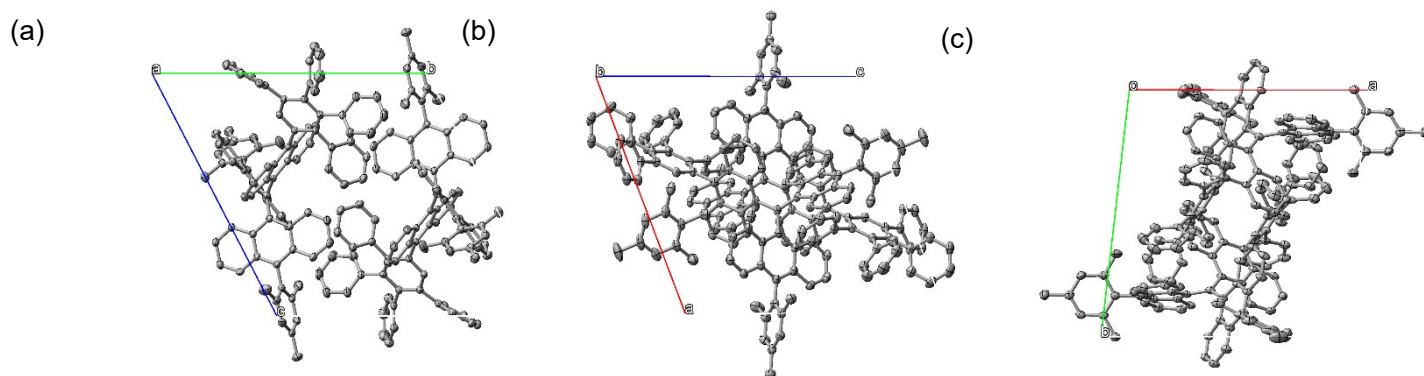

**Figure S2.** X-ray crystal structure of 2. Packing structures (a) from  $a$  axis, (b) from  $b$  axis, and (c) from  $c$  axis.

## Calculated spin distribution of 1'

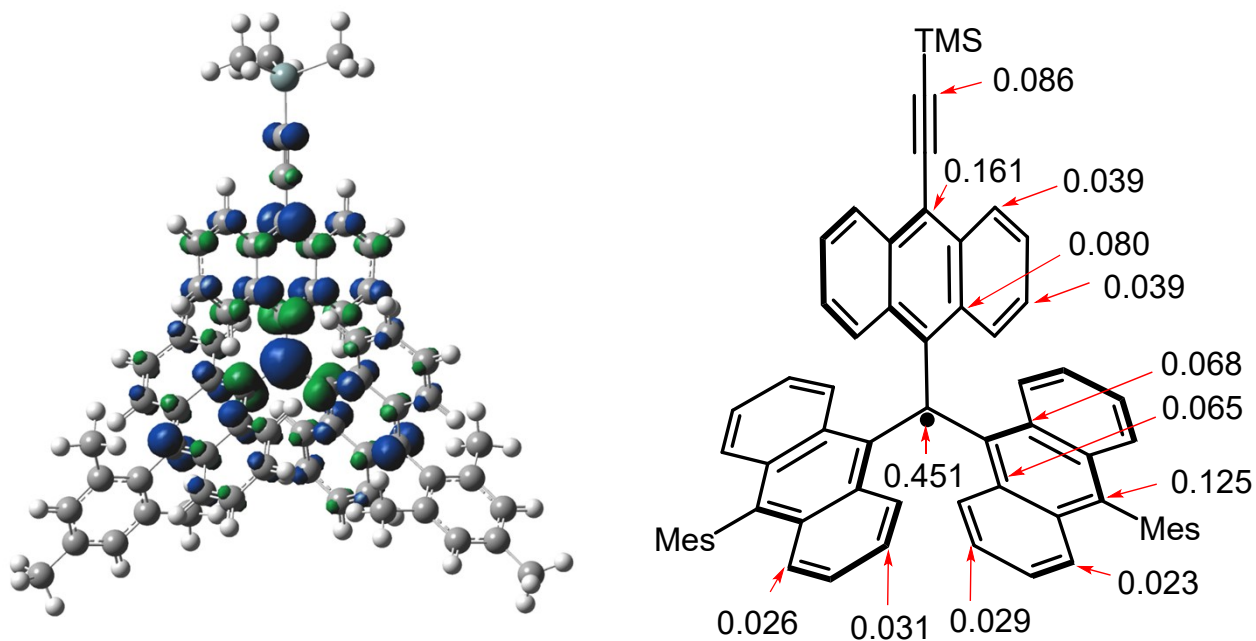

**Figure S3.** The calculated spin density map of 1' (UBLYP/6-31G\*\*//U $\omega$ B97XD/6-31G\*\*). The blue and green surfaces represent  $\alpha$  and  $\beta$  spins, respectively (left). The spin density values for  $\alpha$  spins (right).

# Frontier molecular orbitals and TD-DFT calculations of 1'

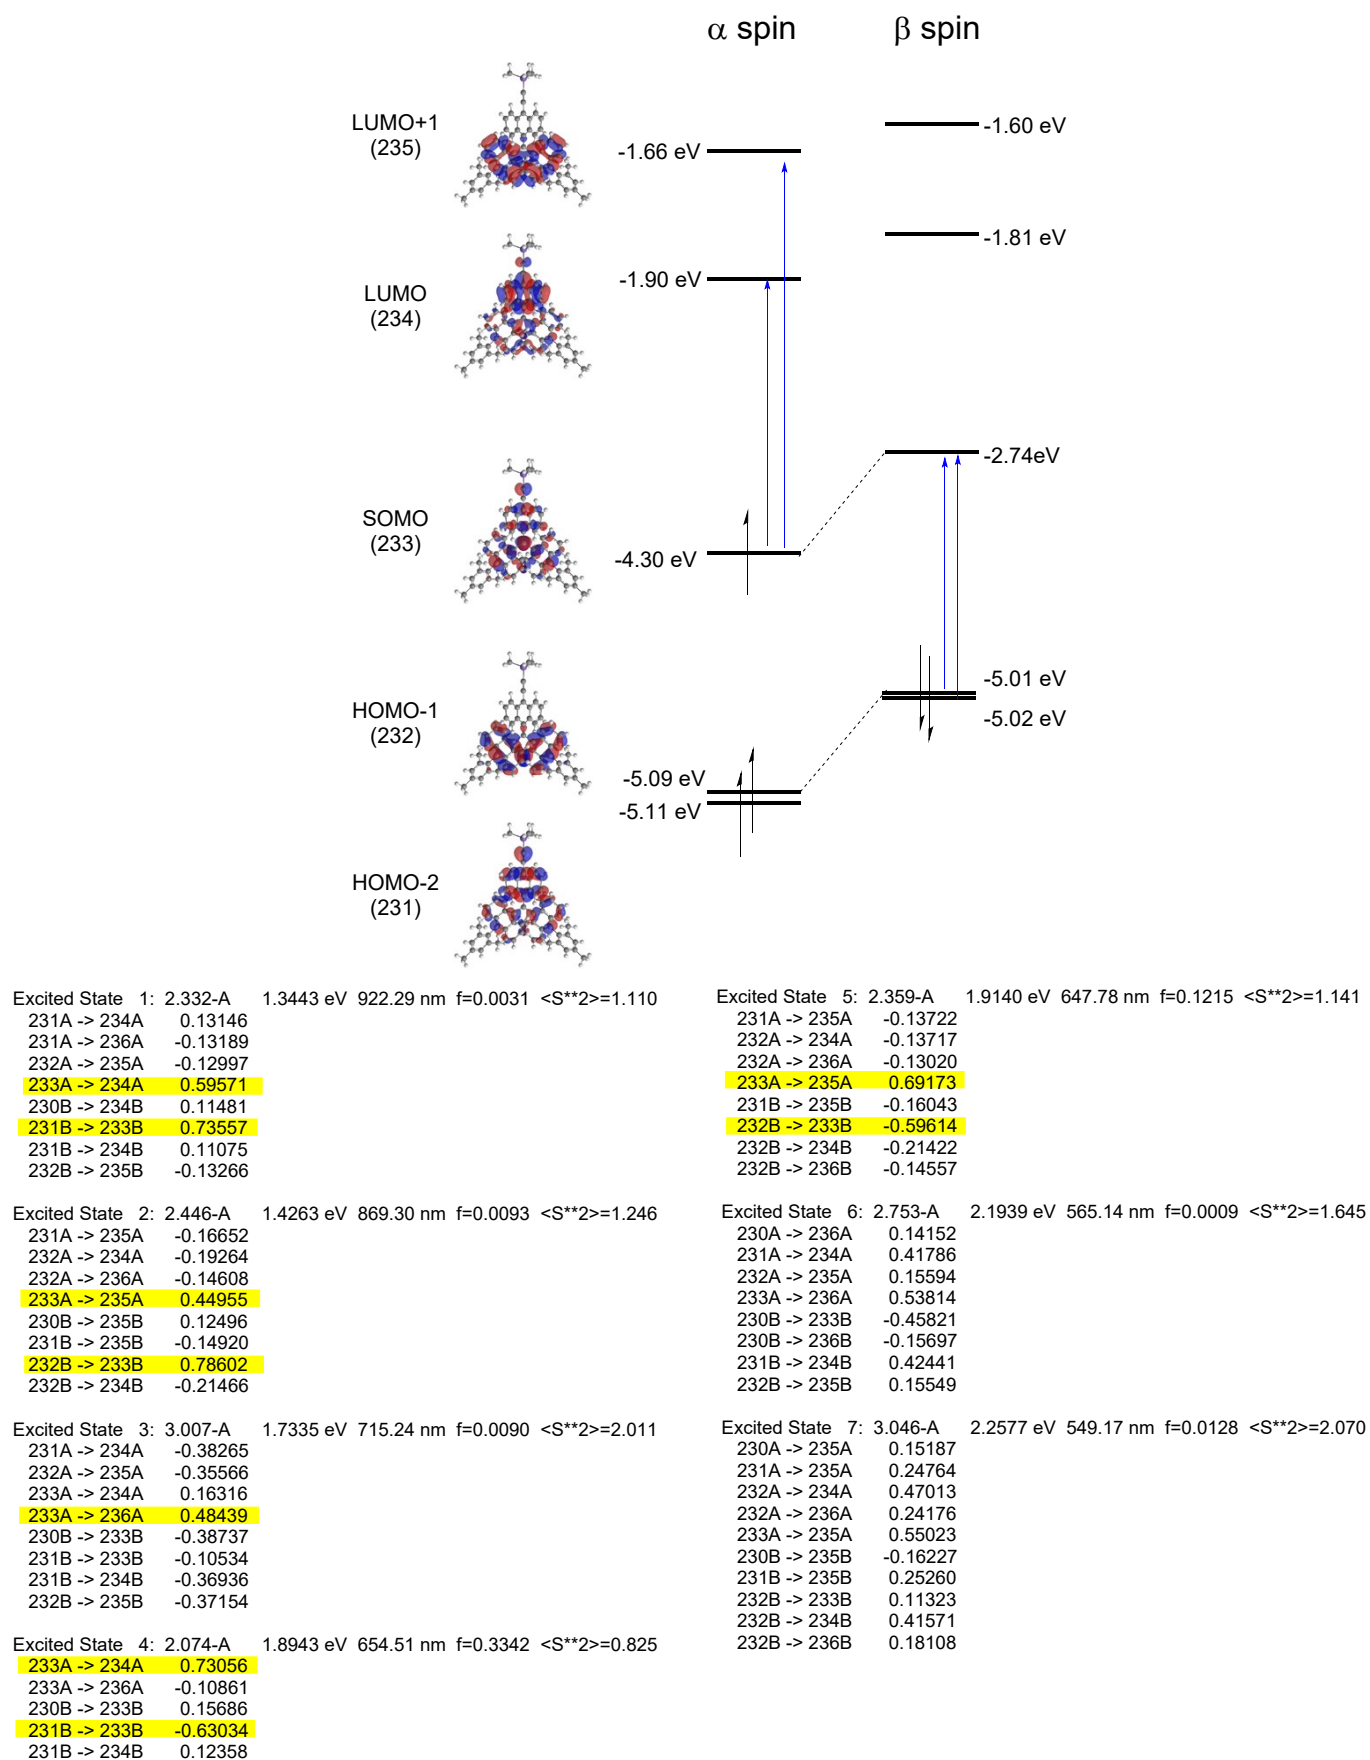

**Figure S4.** Frontier Molecular orbitals, energies, and transition of 1 (top). Yellow highlighted transition in TD calculated table are main contributions for the excitation (down). (UB3LYP/6-31G\*\*// U $\omega$ B97XD/6-31G\*\*)



## Cyclic voltammogram of TAntM radical

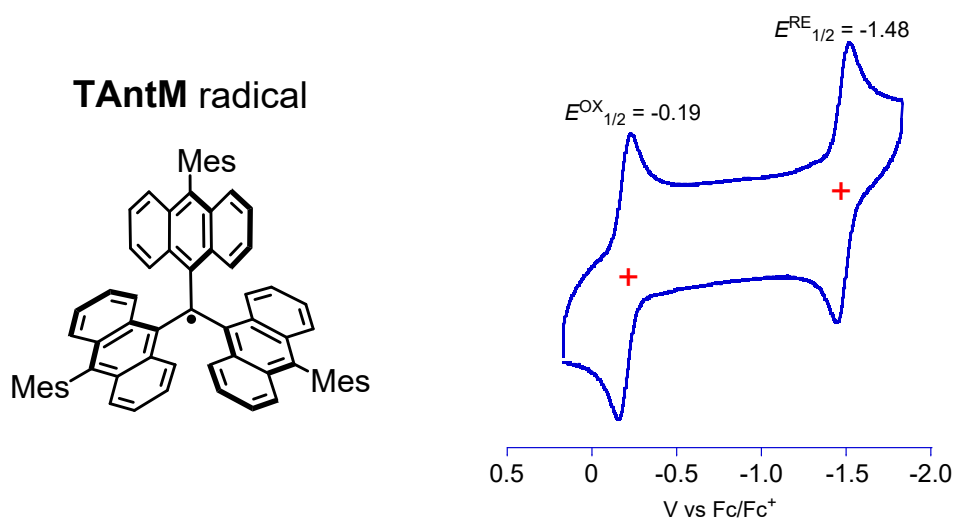

**Figure S5.** Cyclic voltammogram of TAntM radical. Measurement conditions: 0.1 M  $n\text{Bu}_4\text{NPF}_6$  in  $\text{CH}_2\text{Cl}_2$ , scan rate=100  $\text{mV s}^{-1}$ .

## Stability of 1 in air-saturated solution

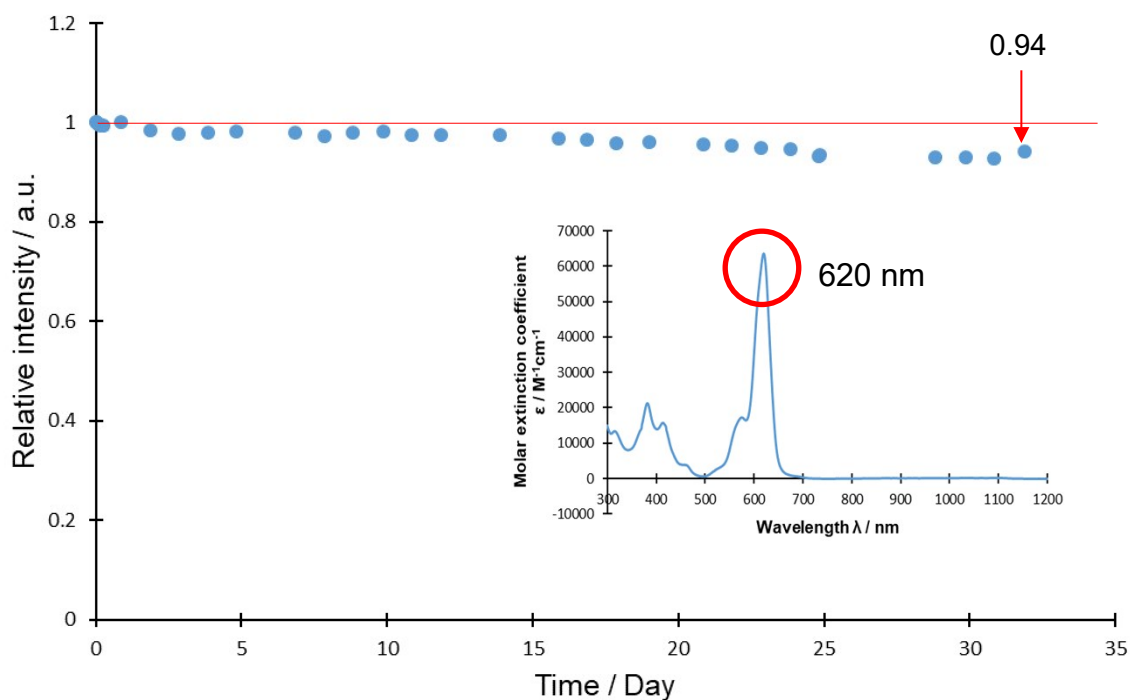

**Figure S6.** Decay plot of absorption intensity of **1** at 620 nm under air-saturated  $\text{CH}_2\text{Cl}_2$  solution ( $1.0 \times 10^{-5}$  M) with absence of light at room temperature. The relative intensity after 32 days from the start of measurement is 0.94.

## IR spectra of **1** and **1'** dimer

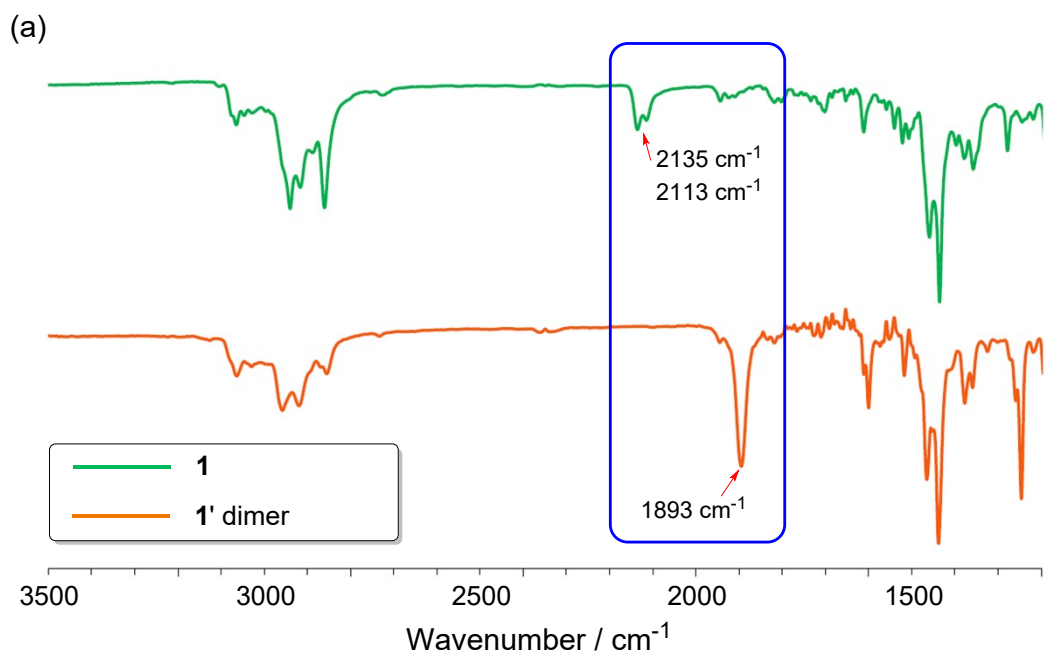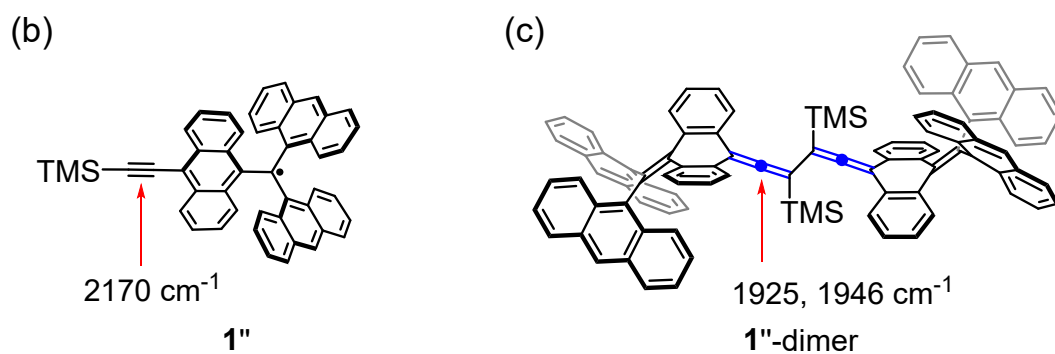

**Figure S7.** (a) IR spectra of **1** and **1'** dimer. (b) Calculated frequency vibration of acetylene unit in **1''**. (c) Calculated frequency vibration of acetylene unit in **1''** dimer. Frequency vibration were computed by (U)B3LYP/6-31G\*, using frequency scaling factor (0.9614). (A. P. Scott, L. Radom *J. Phys. Chem.* **1996**, *100*, 16502-16513.)

# $^{13}\text{C}$ NMR spectra of 4' and 1' dimer

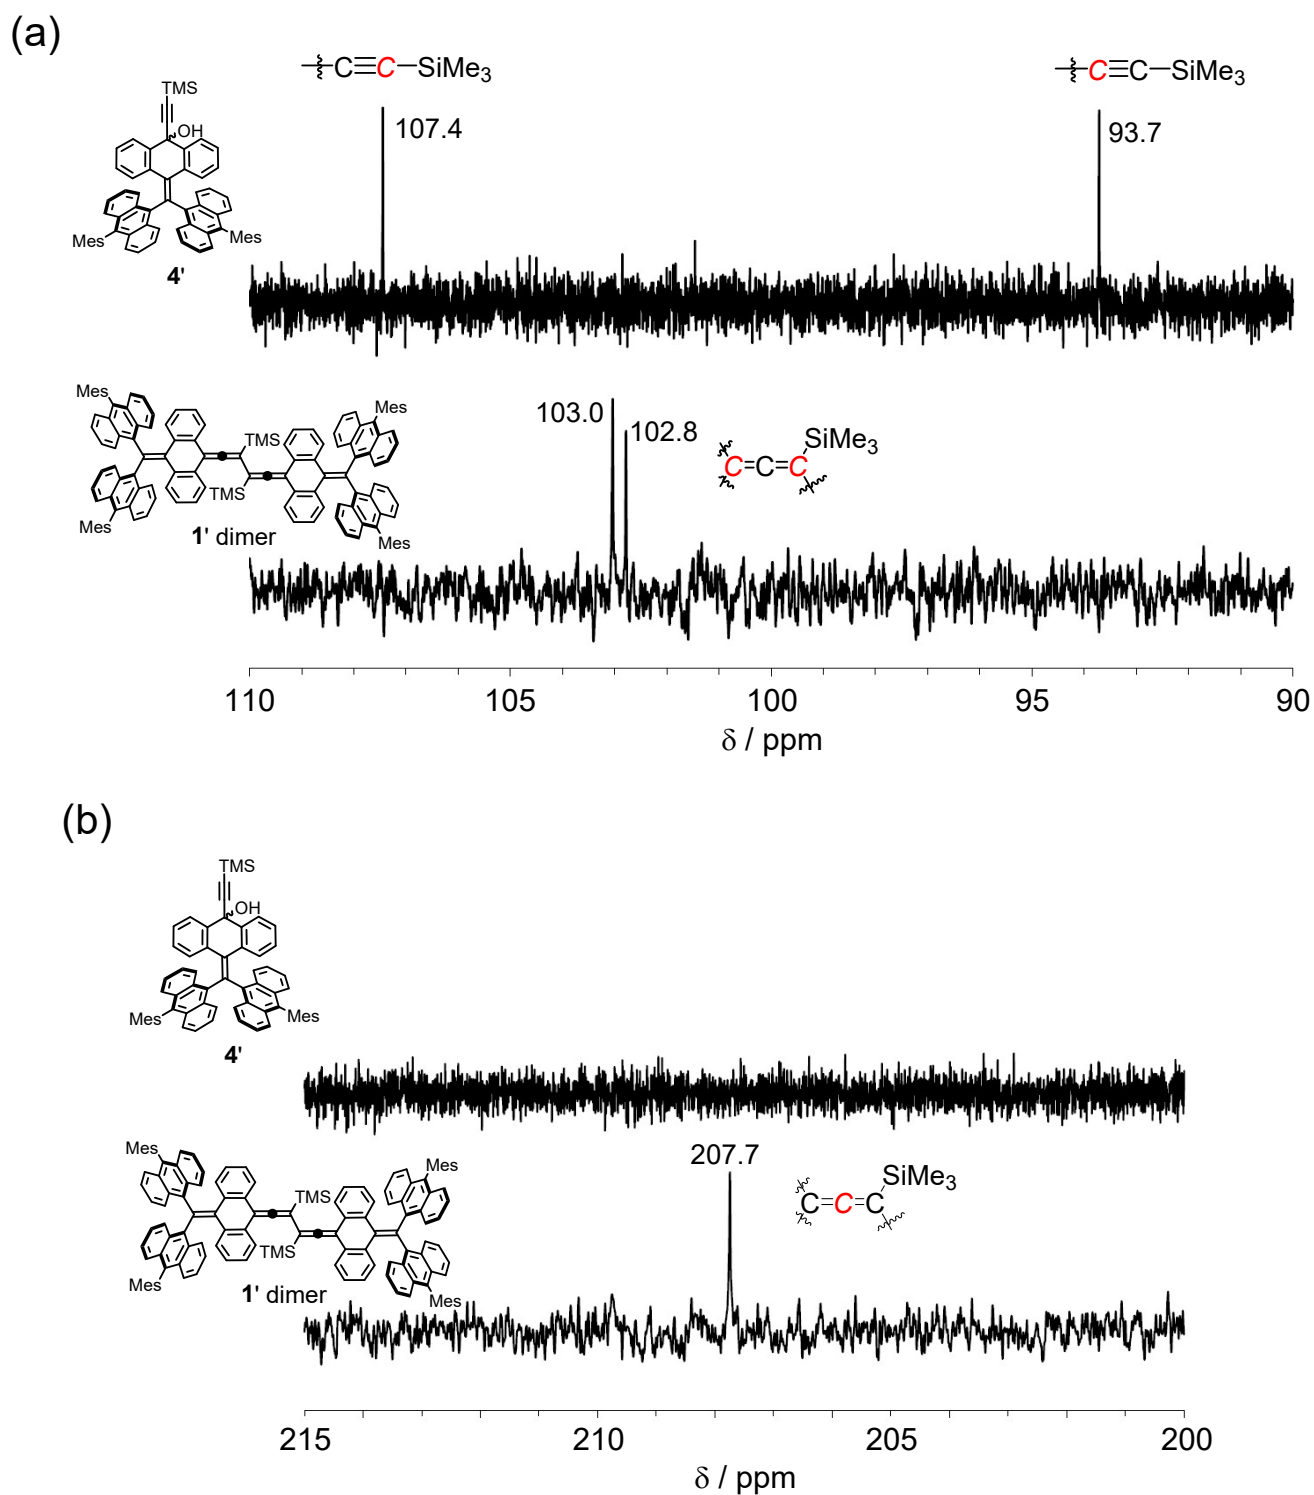

**Figure S8.**  $^{13}\text{C}$  NMR spectra of 4' and 1' dimer. (a) Expanded chemical shift region from 90 to 110 ppm. (b) Expanded chemical shift region from 200 to 215 ppm, where a unique peak from the central carbon of the allene unit is observed at 207.7 ppm for the 1' dimer, but no such peak is observed for the 4'.

## MS spectra of 1' dimer

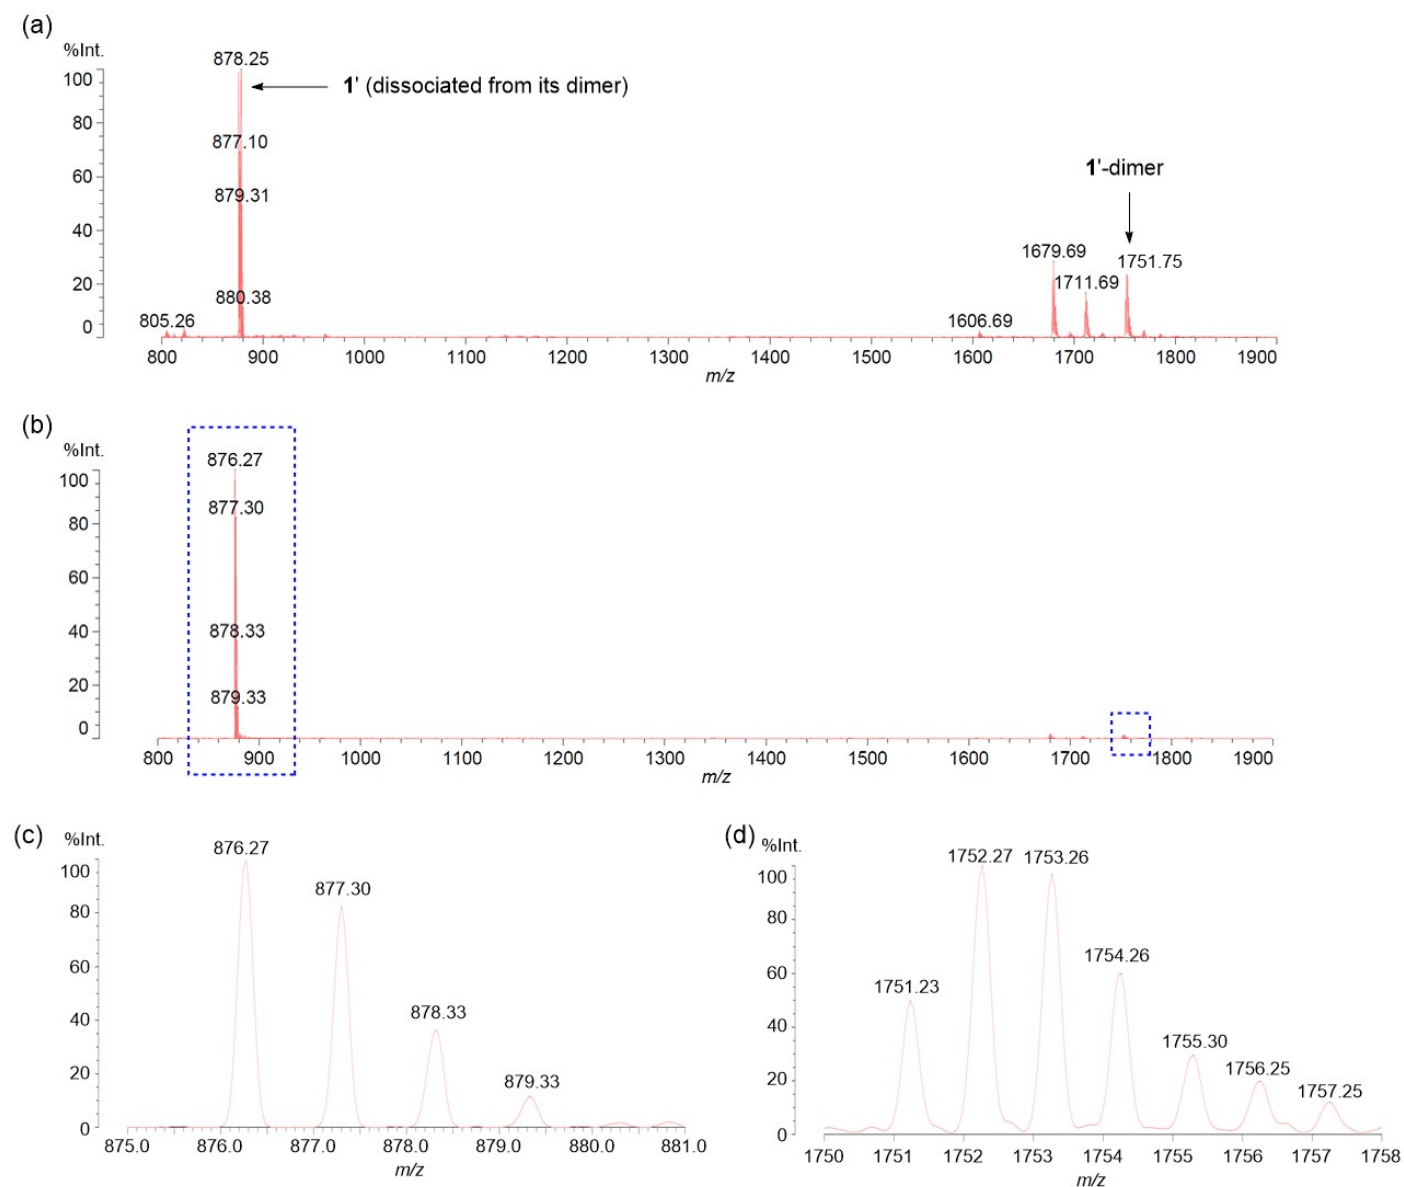

**Figure S9.** MALDI TOF-MS spectra of  $1'$  dimer. (a) Measurement with linear mode.  $M^+$  peak of  $1'$  dimer ( $m/z = 1751.75$ ) as well as  $1'$  ( $m/z = 877.10$ ) dissociated from the dimer are observed. (b) Measurement with reflection mode. The relative intensity of  $1'$  dimer is quite low compared with that of  $1'$ . (c) Expanded  $m/z$  region around  $1'$  in (b). Due to the isotope pattern separated in each 1 Da, this MS peak is originating from dissociated from  $1'$  dimer not originating from dication species of  $1'$  dimer. (d) Expanded  $m/z$  region around  $1'$  dimer in (b).

## X-ray crystallographic data of 1' dimer

**Crystal data for 1.** CCDC 2149932.  $C_{132}H_{110}Si_2$ ,  $M_W = 1752.37$ , triclinic, space group  $P -1$  (no. 2),  $a = 12.1360(10)$ ,  $b = 15.6410(11)$ ,  $c = 16.9992(13)$  Å,  $\alpha = 70.519(7)^\circ$ ,  $\beta = 69.212(7)^\circ$ ,  $\gamma = 83.824(6)^\circ$ ,  $V = 2843.8(4)$  Å<sup>3</sup>,  $Z = 1$ ,  $D = 1.023$  g cm<sup>3</sup>,  $T = 99$  K, Data collection with CuK $\alpha$  radiation (multi-layer mirror monochromated). 10230 measured reflection, 3899 unique reflections; structure solution by direct methods (Shelxs), refinement by fullmatrix least squares on  $F$  with anisotropic temperature factors for the non-H atoms. Final  $R_1 = 0.0877$ ,  $wR_2 = 0.2489$ ,  $GOF = 0.925$ .

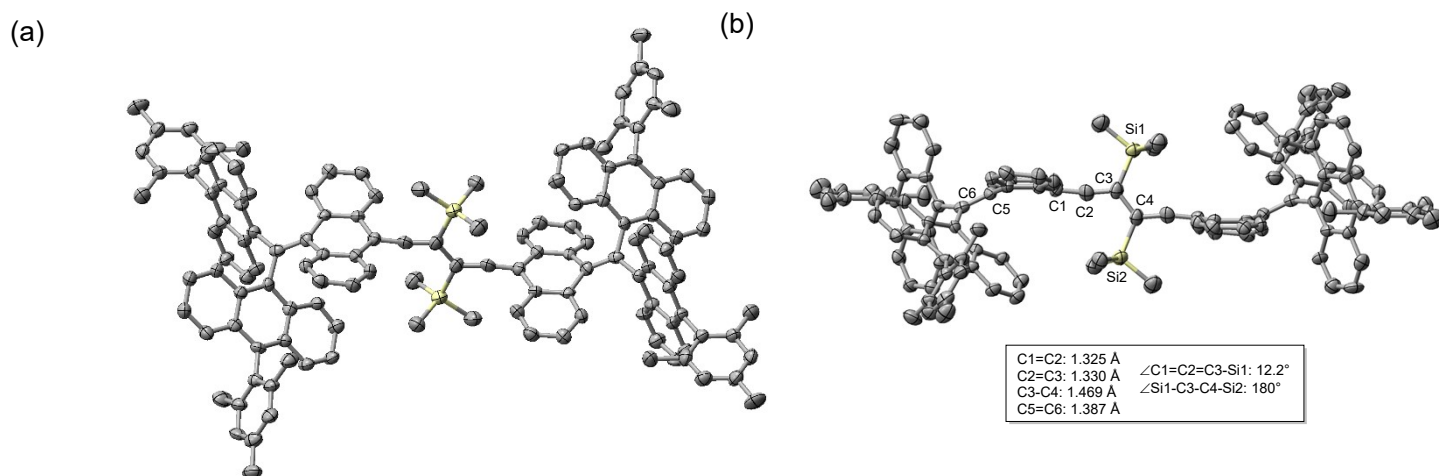

**Figure S10.** X-ray crystal structure of 1' dimer. (a) Side view-1 (b) Side view-2 with bond length and dihedral angles.

## Relative energy evaluation for $\sigma$ -dimer structures

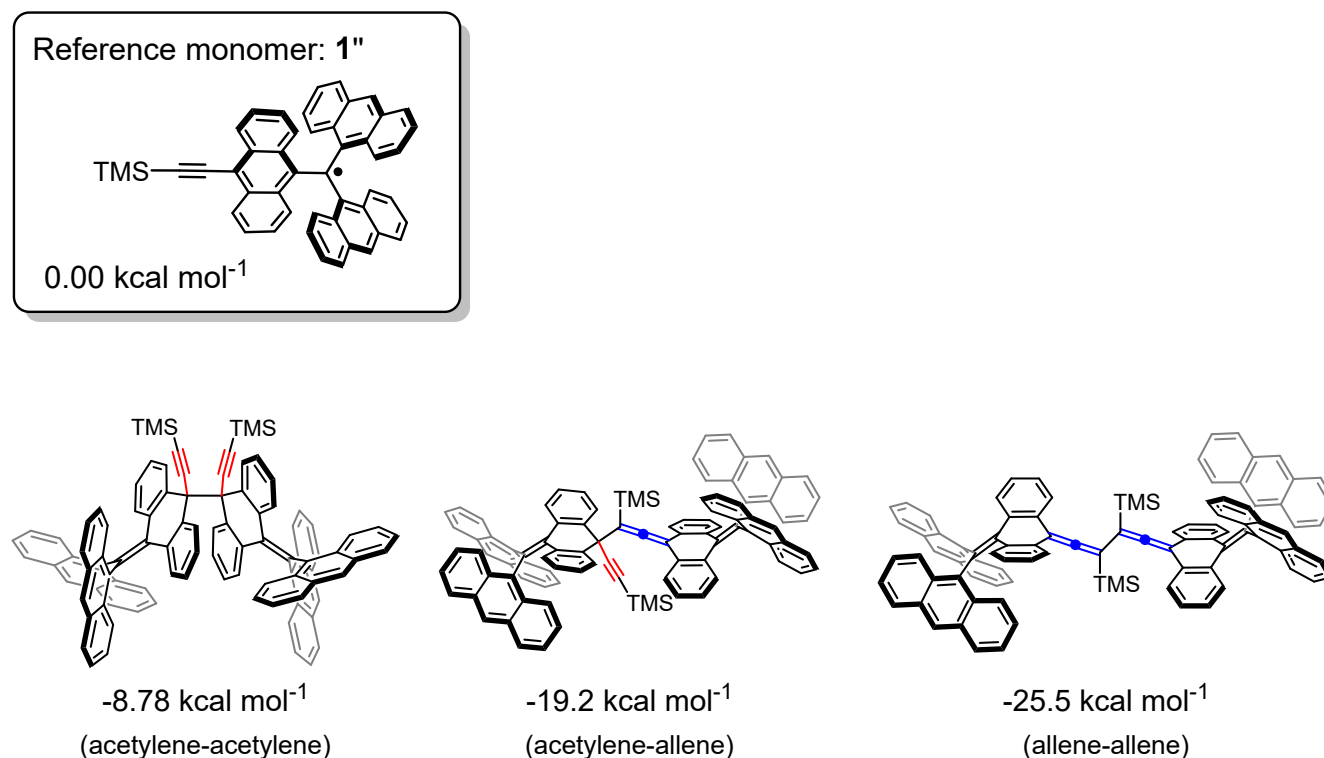

**Figure S11.** Quantum chemical calculations of relative energy evaluation for  $\sigma$ -dimer structures of 1'', acetylene-acetylene type dimer (left), acetylene-allene type dimer, (center), and allene-allene type (right) ( $\omega$ B97XD/6-31G\*\*).

## UV-vis-NIR, ESR spectra, CV of 2

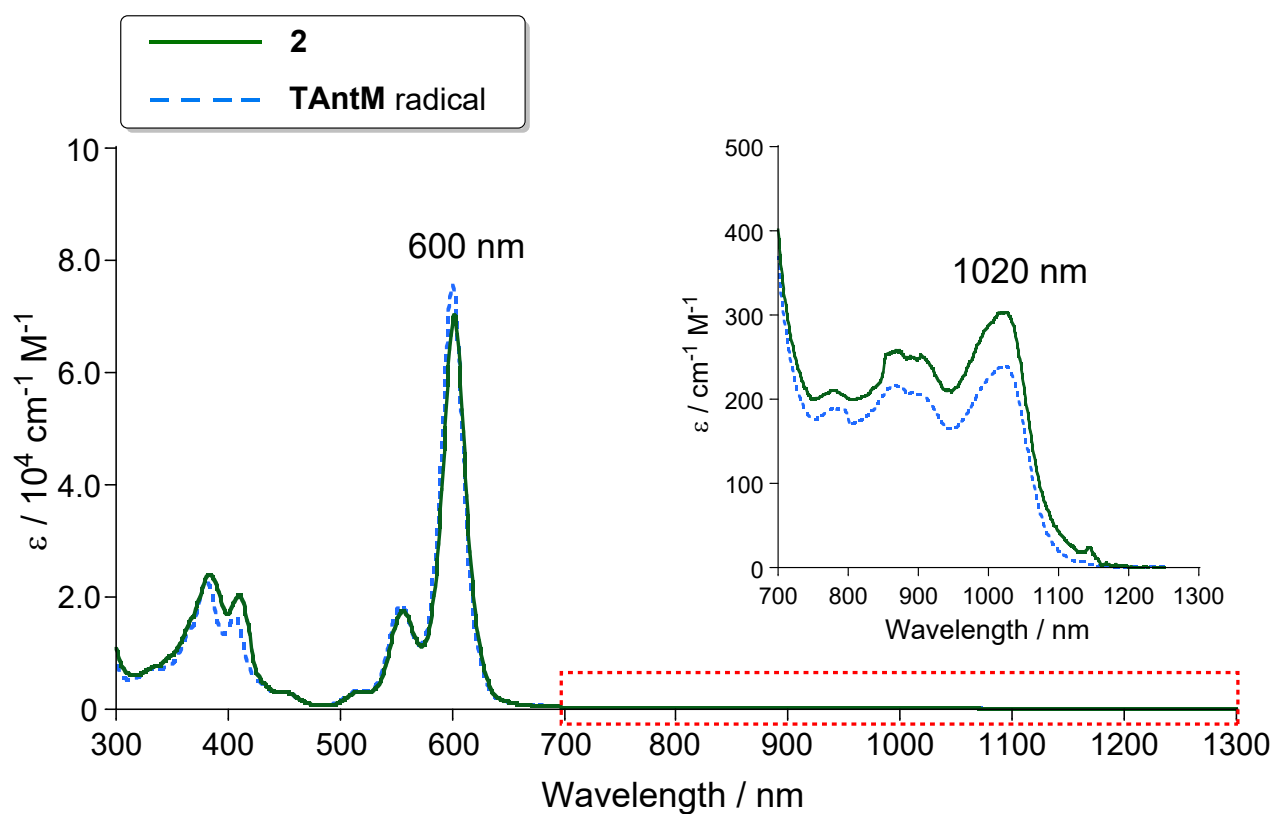

**Figure S12.** UV/Vis/NIR spectra of **2** (green solid) and TAntM radical (blue dash) in  $\text{CH}_2\text{Cl}_2$  (inset: expansion from 700 to 1300 nm).

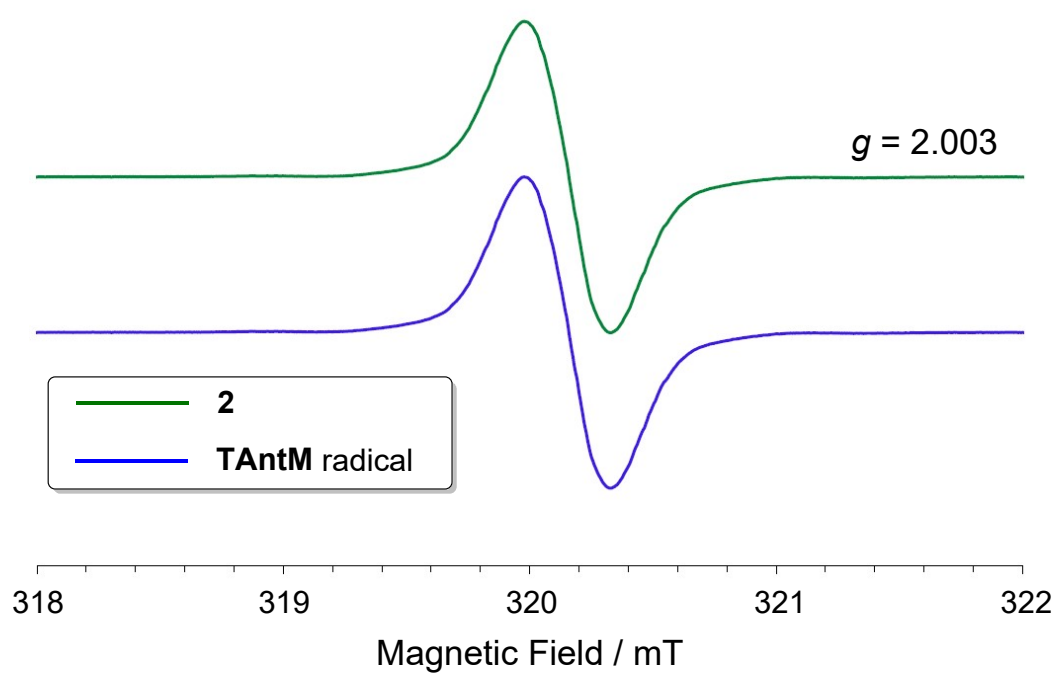

**Figure S13.** ESR spectra of **2** (green solid) and TAntM radical (blue solid) in toluene.

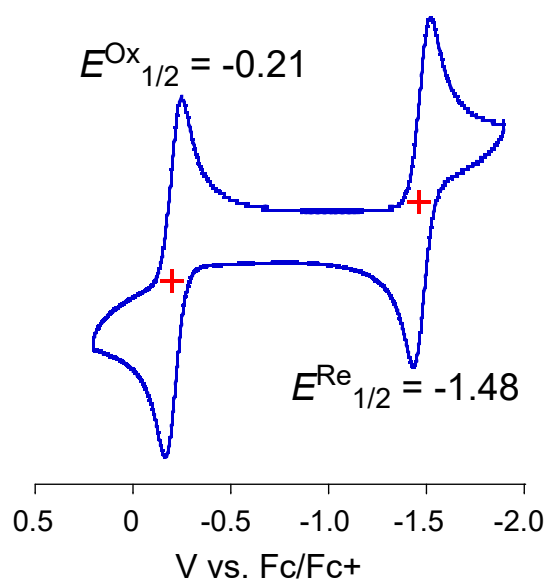

**Figure S14.** Cyclic voltammogram of **2**. Measurement conditions: 0.1 M  $n\text{Bu}_4\text{NPF}_6$  in  $\text{CH}_2\text{Cl}_2$ , scan rate =  $100 \text{ mV s}^{-1}$ .

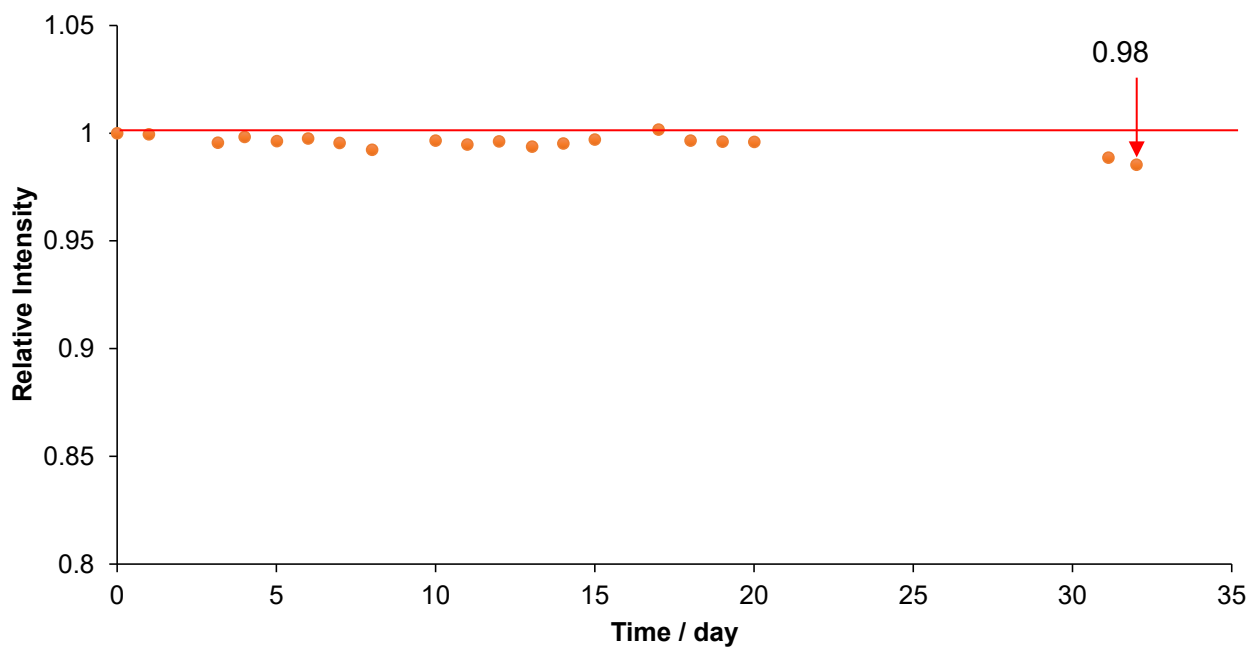

**Figure S15.** Decay plot of absorption intensity of **2** at 600 nm under air-saturated  $\text{CH}_2\text{Cl}_2$  solution ( $1.0 \times 10^{-5} \text{ M}$ ) with absence of light at room temperature. The relative intensity after 32 days from the start of measurement is 0.98.

# NMR spectra

$^1\text{H}$  NMR (500 MHz) of compound 4 ( $\text{CD}_2\text{Cl}_2$ )

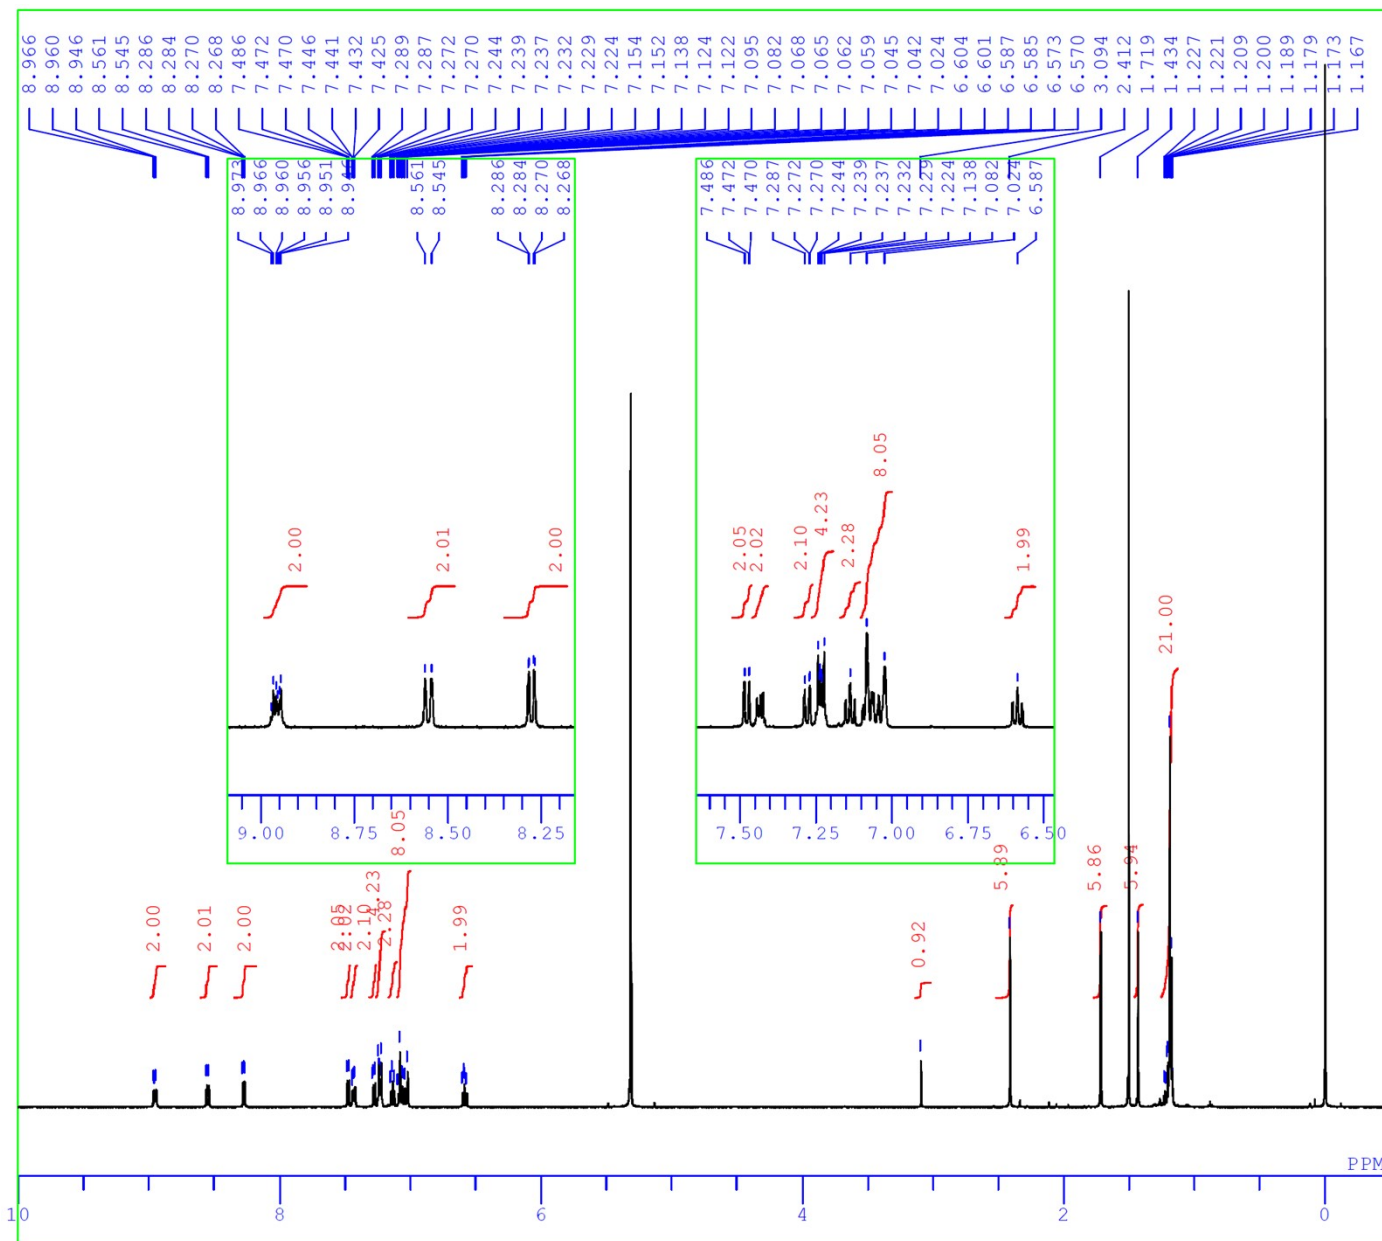



$^{13}\text{C}$  NMR (125 MHz) of compound **4** ( $\text{CD}_2\text{Cl}_2$ )

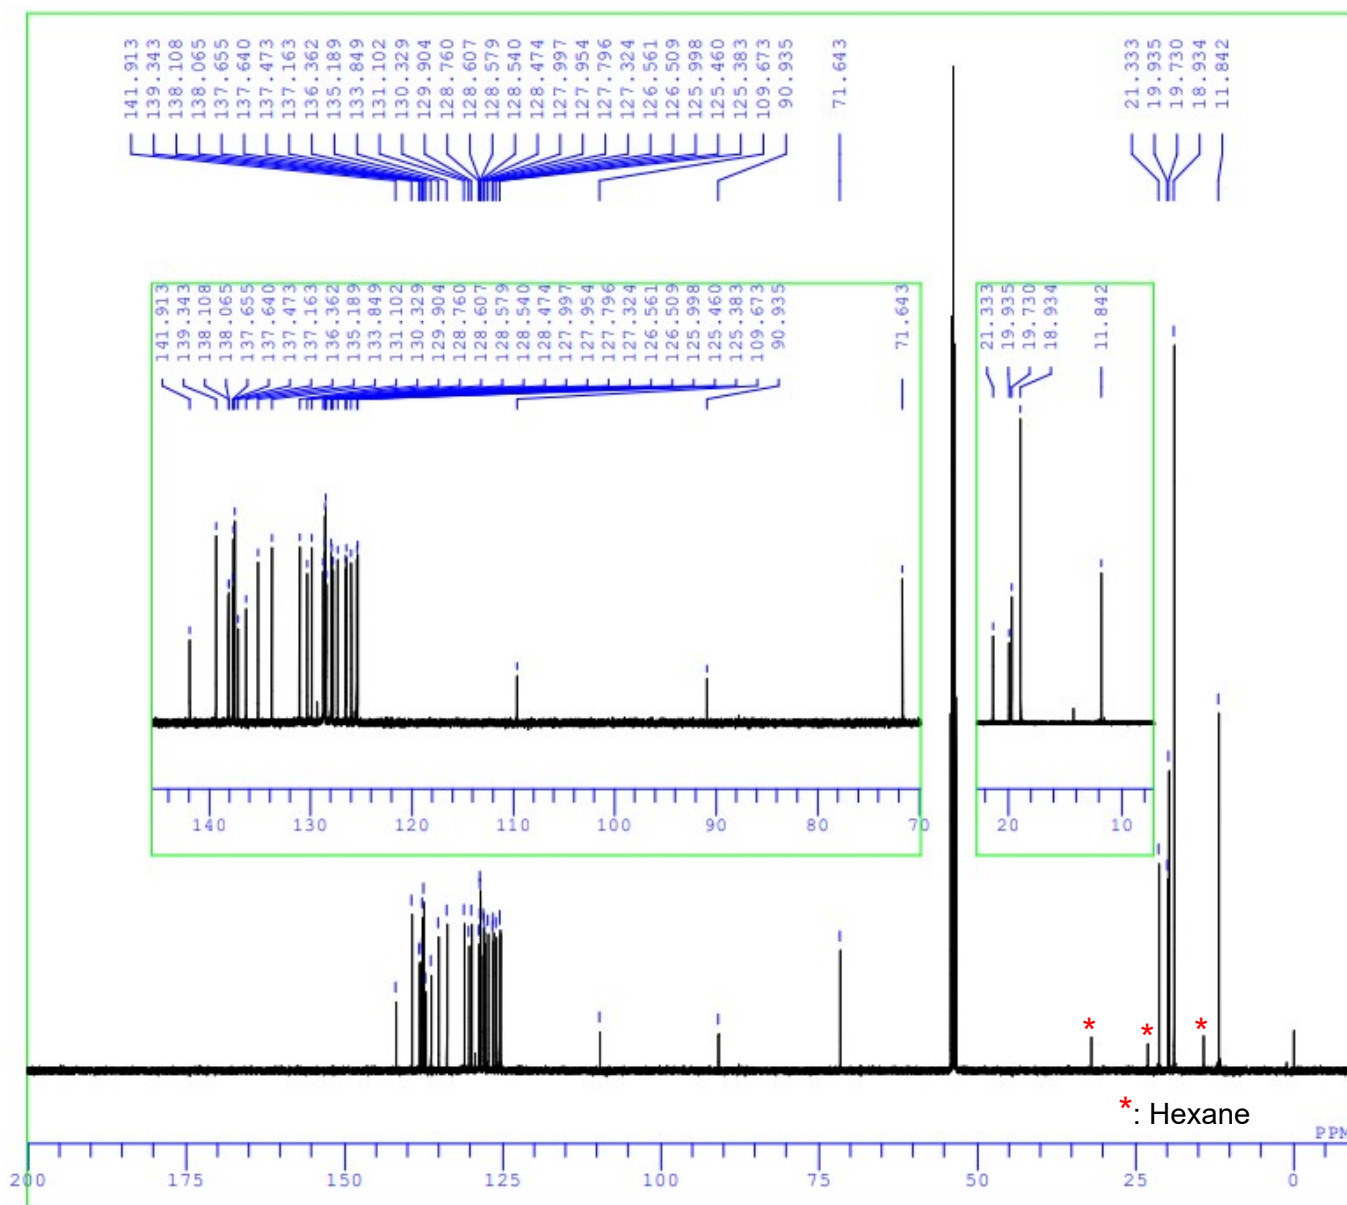

$^1\text{H}$  NMR (500 MHz) of compound **4'** ( $\text{CD}_2\text{Cl}_2$ )

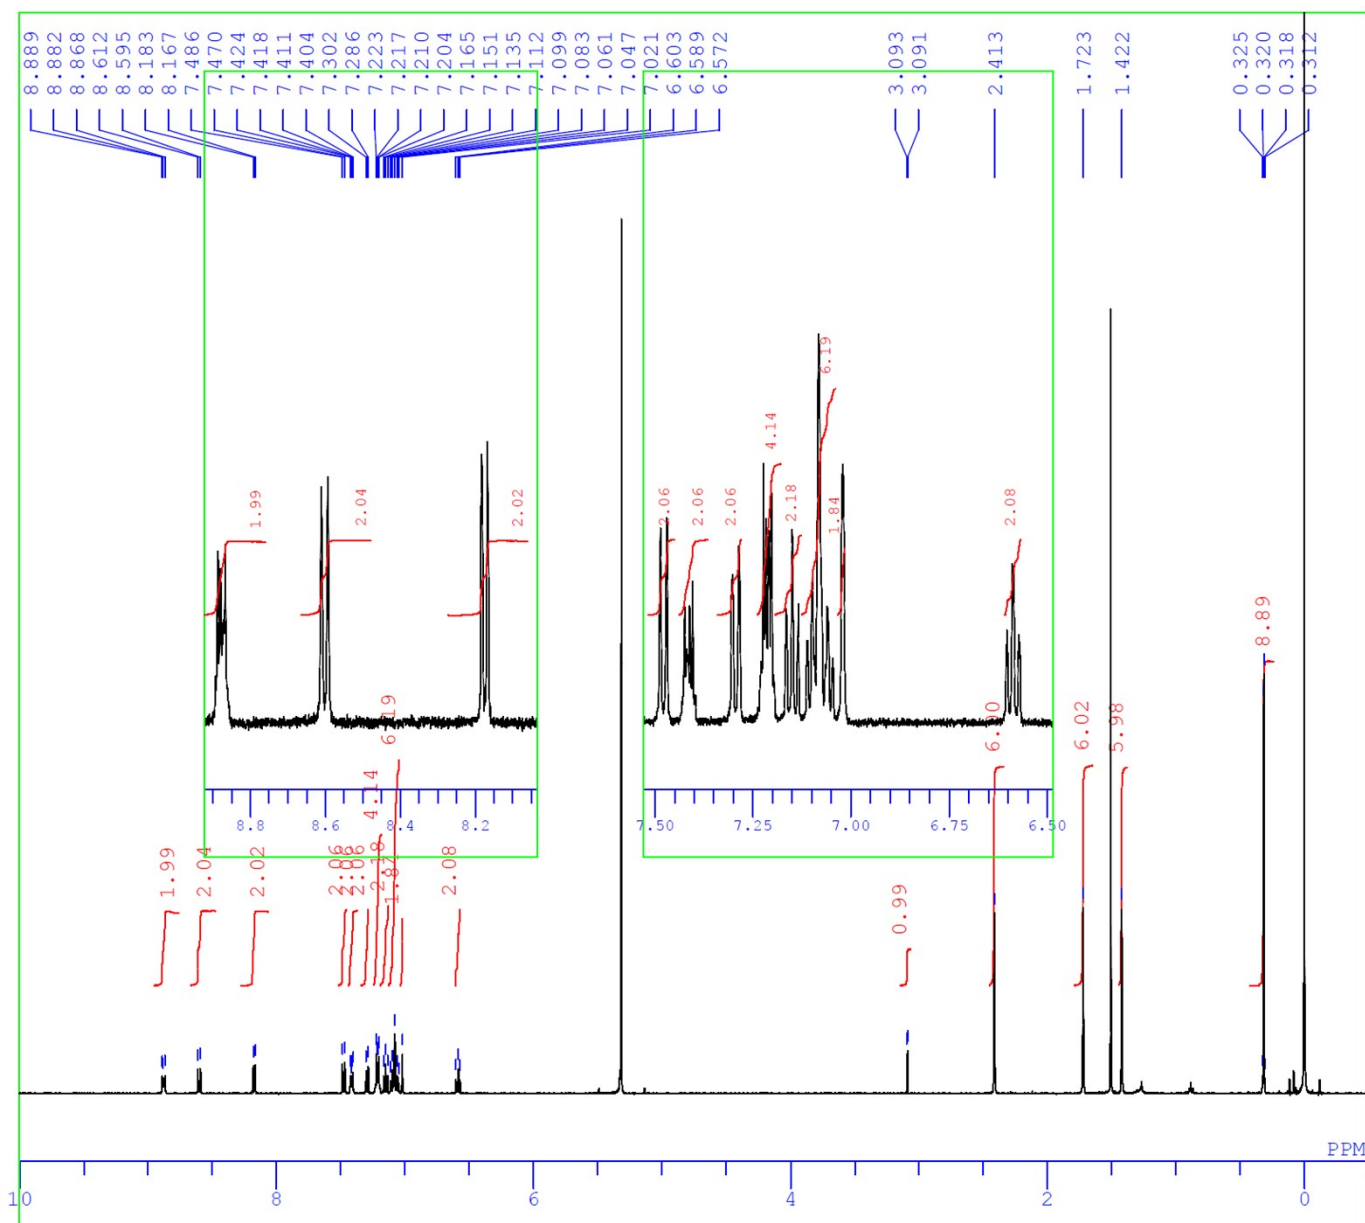

$^{13}\text{C}$  NMR (125 MHz) of compound 4' ( $\text{CD}_2\text{Cl}_2$ )

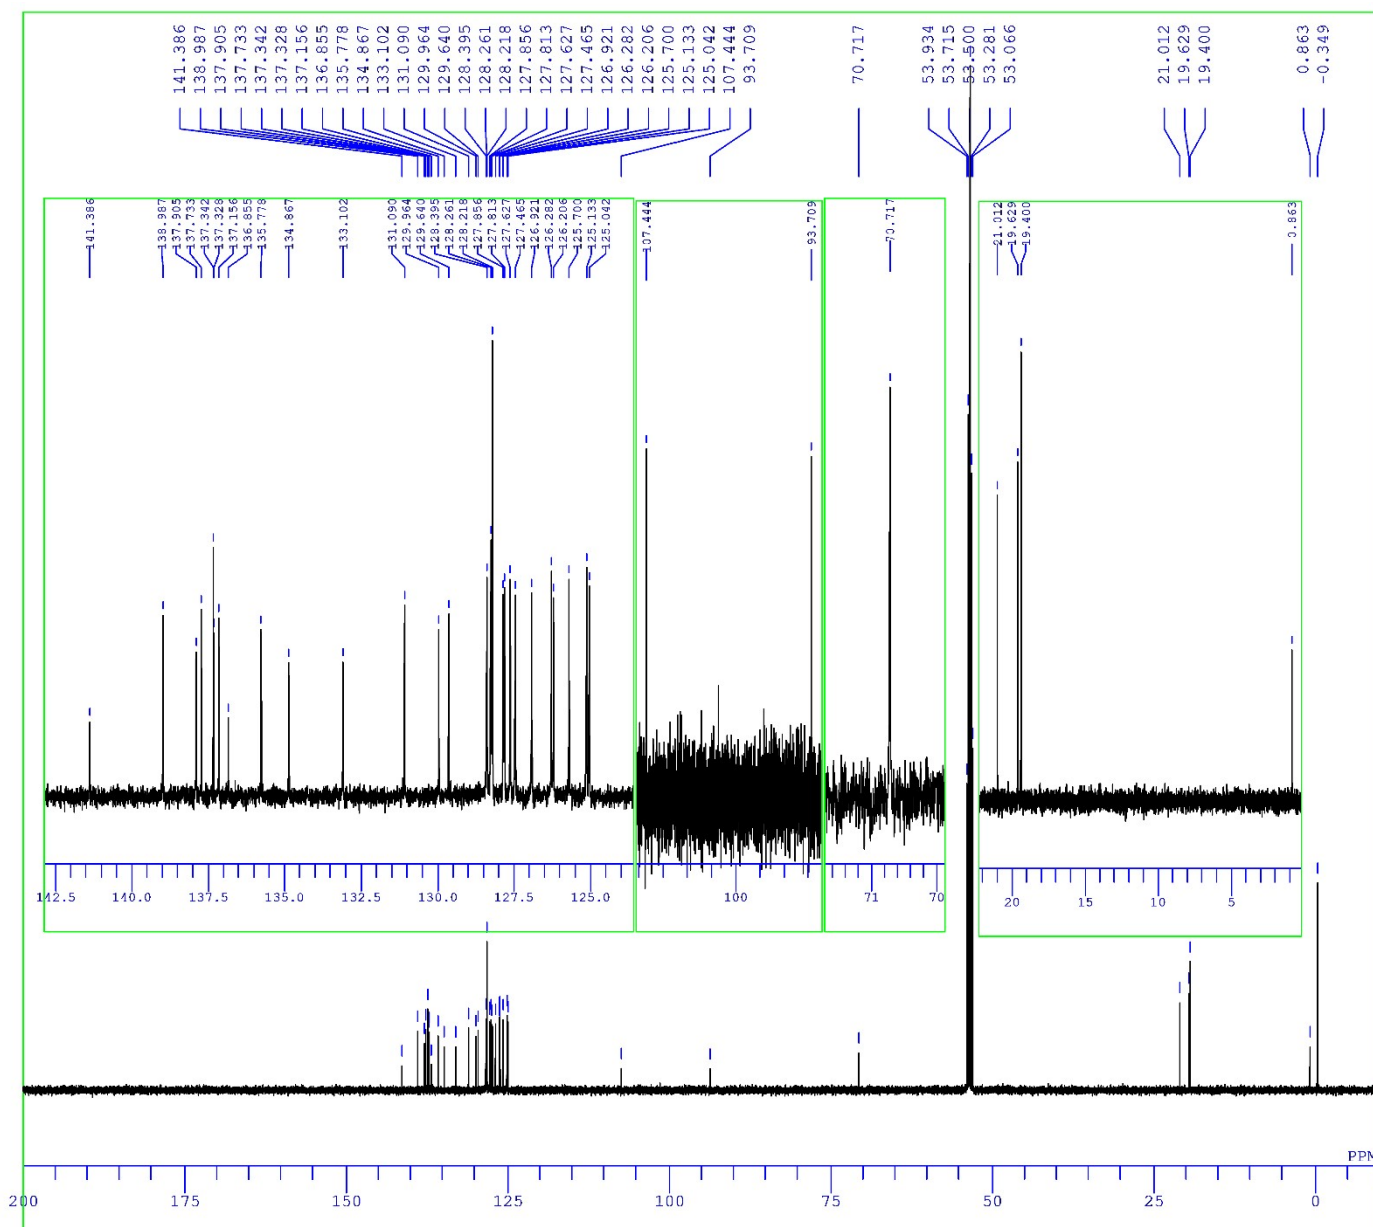

$^1\text{H}$  NMR (700 MHz) of compound **1'** dimer ( $\text{CD}_2\text{Cl}_2/\text{CS}_2$ ).

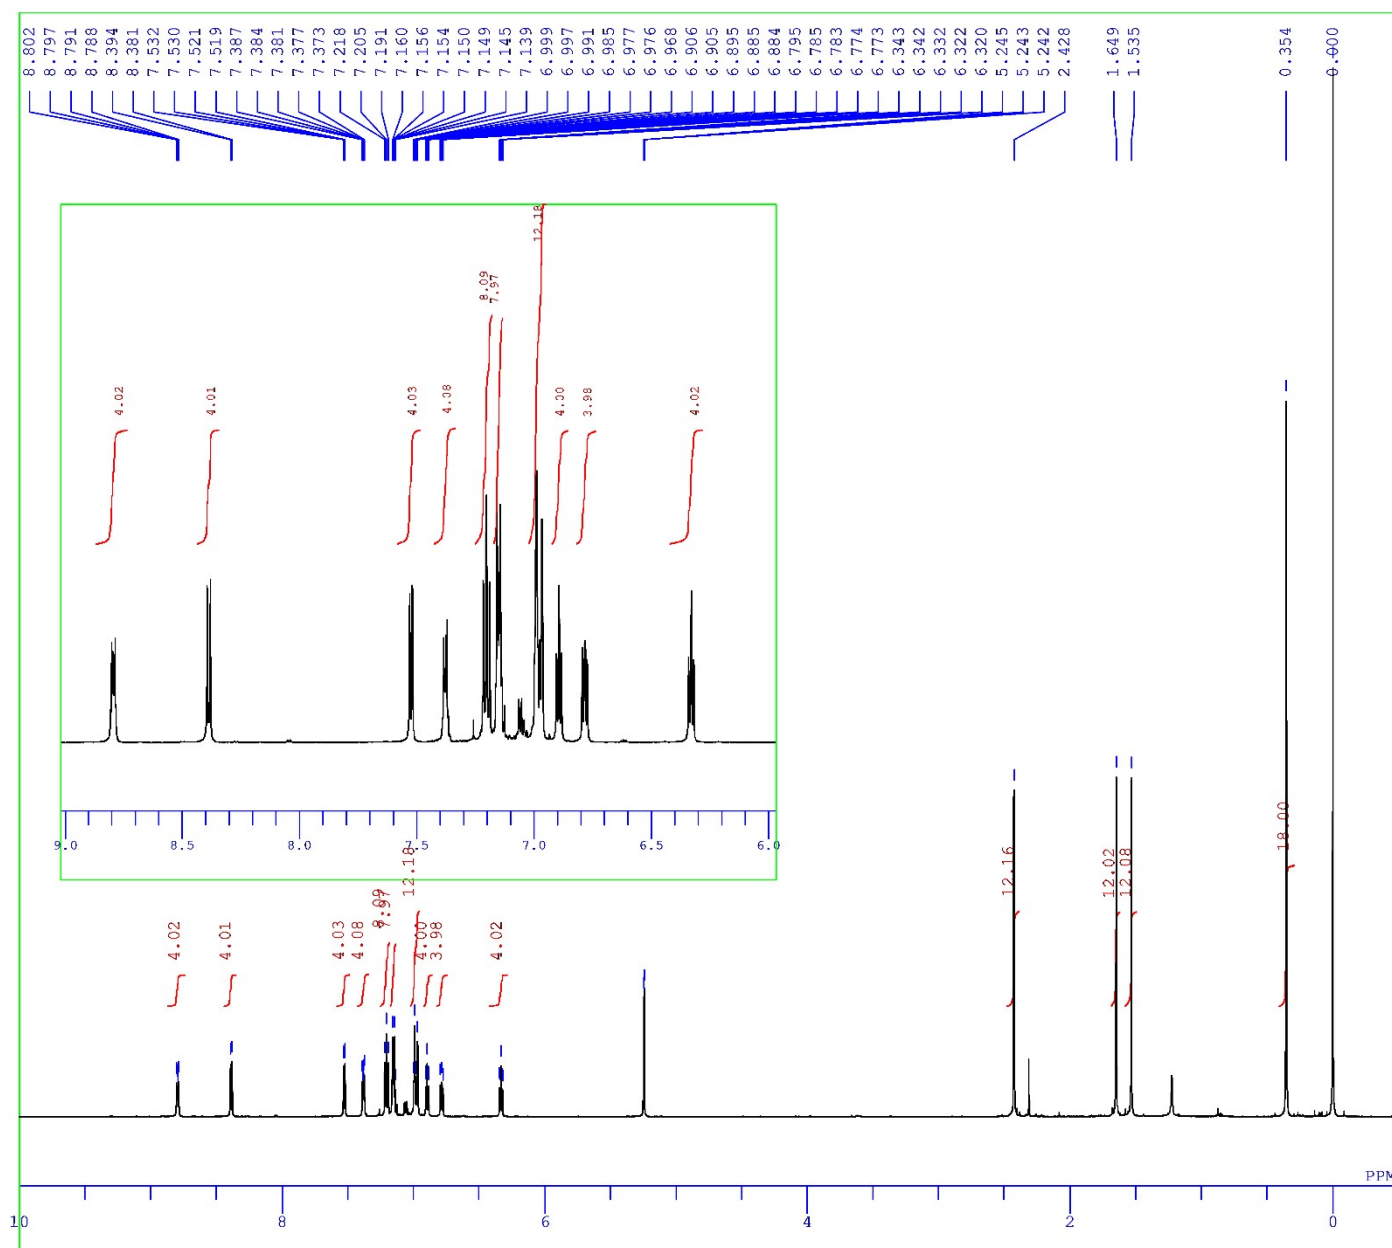

$^{13}\text{C}$  NMR (175 MHz) of compound **1'** dimer ( $\text{CD}_2\text{Cl}_2/\text{CS}_2$ )

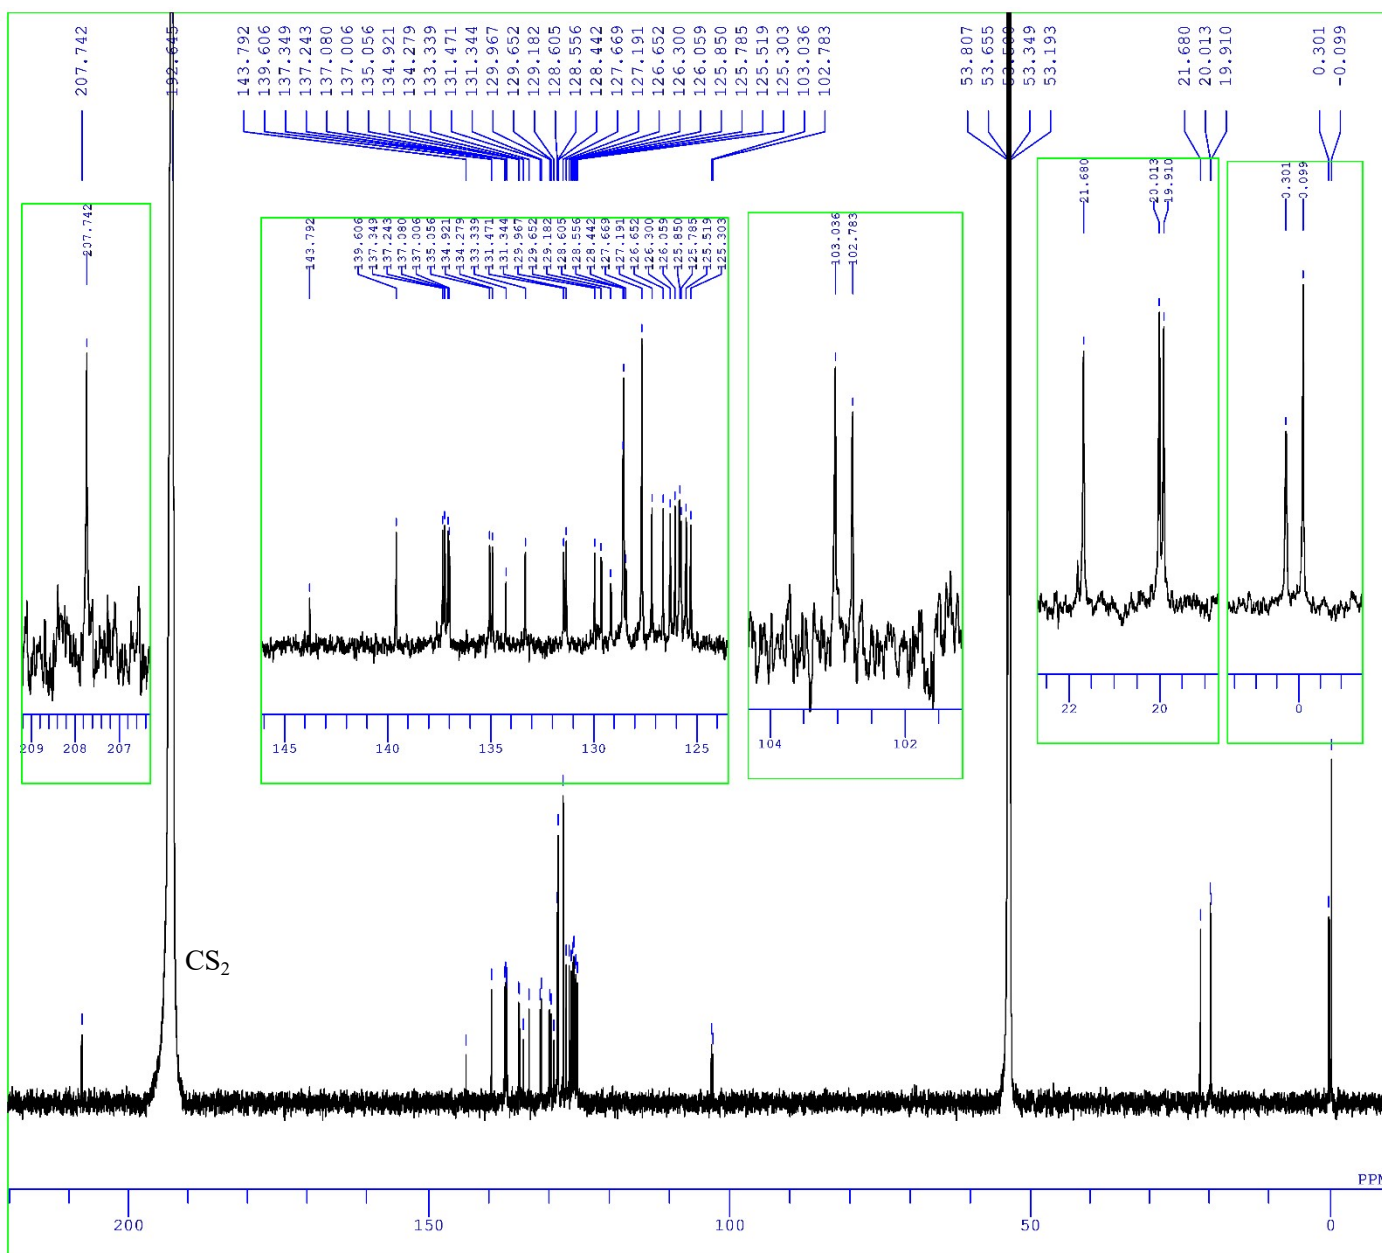

## Calculated Cartesian coordination

**Table S1.** Cartesian Coordinates of 1' (C<sub>66</sub>H<sub>55</sub>Si, total 122 atoms) ( $\omega$ B97XD/6-31G\*\*).

| Center Number | Atomic Number | Atomic Type | Coordinates (Angstroms) |           |           | Center Number | Atomic Number | Atomic Type | Coordinates (Angstroms) |           |           |
|---------------|---------------|-------------|-------------------------|-----------|-----------|---------------|---------------|-------------|-------------------------|-----------|-----------|
|               |               |             | X                       | Y         | Z         |               |               |             | X                       | Y         | Z         |
| 1             | 6             | 0           | -0.379275               | -0.003823 | 0.004101  | 62            | 1             | 0           | -1.657439               | -1.621201 | -1.641018 |
| 2             | 6             | 0           | 0.402506                | -1.245537 | 0.144445  | 63            | 1             | 0           | -2.073472               | -3.577312 | -2.996097 |
| 3             | 6             | 0           | 0.121727                | -2.393733 | -0.651814 | 64            | 1             | 0           | -0.552194               | -5.558823 | -2.879431 |
| 4             | 6             | 0           | -0.984423               | -2.461990 | -1.557176 | 65            | 1             | 0           | 1.433513                | -5.482918 | -1.428853 |
| 5             | 6             | 0           | -1.218200               | -3.563667 | -2.328245 | 66            | 1             | 0           | 4.142136                | -7.488188 | 1.408301  |
| 6             | 6             | 0           | -0.350766               | -4.683642 | -2.270245 | 67            | 1             | 0           | 2.222262                | -4.877777 | 2.632235  |
| 7             | 6             | 0           | 0.746159                | -4.644587 | -1.463279 | 68            | 1             | 0           | 2.247213                | -6.646199 | 2.518579  |
| 8             | 6             | 0           | 1.031368                | -3.503805 | -0.647035 | 69            | 1             | 0           | 1.142301                | -5.695572 | 1.509430  |
| 9             | 6             | 0           | 2.217061                | -3.453723 | 0.107158  | 70            | 1             | 0           | 5.833523                | -8.608459 | 0.012670  |
| 10            | 6             | 0           | 3.227860                | -4.545700 | -0.011507 | 71            | 1             | 0           | 7.090928                | -7.386031 | 0.213722  |
| 11            | 6             | 0           | 3.202469                | -5.638029 | 0.867372  | 72            | 1             | 0           | 6.515069                | -7.793514 | -1.403710 |
| 12            | 6             | 0           | 4.163620                | -6.638546 | 0.729416  | 73            | 1             | 0           | 1.025931                | -0.516749 | -2.127115 |
| 13            | 6             | 0           | 5.147868                | -6.576526 | -0.255092 | 74            | 1             | 0           | 3.015224                | -0.502970 | -3.515368 |
| 14            | 6             | 0           | 2.147895                | -5.724019 | 1.941264  | 75            | 1             | 0           | 4.723761                | 1.307144  | -3.266796 |
| 15            | 6             | 0           | 6.199884                | -7.650701 | -0.366432 | 76            | 1             | 0           | 4.322735                | 3.153306  | -1.691249 |
| 16            | 6             | 0           | 0.388972                | 1.245548  | -0.141065 | 77            | 1             | 0           | 5.883294                | 5.451261  | 1.865974  |
| 17            | 6             | 0           | 1.517835                | 1.282219  | -1.008731 | 78            | 1             | 0           | 3.296497                | 3.286347  | 2.558849  |
| 18            | 6             | 0           | 1.756609                | 0.268504  | -1.989385 | 79            | 1             | 0           | 5.065470                | 3.382484  | 2.621720  |
| 19            | 6             | 0           | 2.870650                | 0.280030  | -2.777762 | 80            | 1             | 0           | 4.258452                | 2.368137  | 1.410407  |
| 20            | 6             | 0           | 3.831302                | 1.316316  | -2.649415 | 81            | 1             | 0           | 7.063495                | 7.343113  | 0.757812  |
| 21            | 6             | 0           | 3.612764                | 2.337499  | -1.773654 | 82            | 1             | 0           | 5.753821                | 8.479017  | 1.087427  |
| 22            | 6             | 0           | 2.439764                | 2.374762  | -0.954070 | 83            | 1             | 0           | 6.291729                | 8.218945  | -0.573409 |
| 23            | 6             | 0           | 2.184286                | 3.469541  | -0.111637 | 84            | 1             | 0           | -0.860261               | 1.405940  | -2.124879 |
| 24            | 6             | 0           | 3.186888                | 4.569329  | 0.004403  | 85            | 1             | 0           | -2.126118               | 2.712912  | -3.722478 |
| 25            | 6             | 0           | 4.173223                | 4.490866  | 1.000343  | 86            | 1             | 0           | -4.617033               | 2.851601  | -3.560521 |
| 26            | 6             | 0           | 5.115484                | 5.512854  | 1.097858  | 87            | 1             | 0           | -5.796588               | 1.568284  | -1.819180 |
| 27            | 6             | 0           | 5.099221                | 6.608756  | 0.236421  | 88            | 1             | 0           | 1.034877                | 0.524204  | 2.125642  |
| 28            | 6             | 0           | 4.206298                | 3.319264  | 1.949655  | 89            | 1             | 0           | 3.030917                | 0.528116  | 3.504049  |
| 29            | 6             | 0           | 6.108269                | 7.719481  | 0.381693  | 90            | 1             | 0           | 4.753280                | -1.267855 | 3.248593  |
| 30            | 6             | 0           | -1.832325               | -0.011466 | 0.008777  | 91            | 1             | 0           | 4.360048                | -3.118442 | 1.676177  |
| 31            | 6             | 0           | -2.570666               | 0.754651  | -0.953083 | 92            | 1             | 0           | 5.909872                | -5.421324 | -1.896772 |
| 32            | 6             | 0           | -1.934037               | 1.458063  | -2.019753 | 93            | 1             | 0           | 3.311399                | -3.274163 | -2.574285 |
| 33            | 6             | 0           | -2.647220               | 2.190719  | -2.926698 | 94            | 1             | 0           | 5.080965                | -3.353330 | -2.644392 |
| 34            | 6             | 0           | -4.058253               | 2.259212  | -2.843222 | 95            | 1             | 0           | 4.269349                | -2.342156 | -1.433547 |
| 35            | 6             | 0           | -4.713758               | 1.553991  | -1.876337 | 96            | 1             | 0           | -0.832148               | -1.417468 | 2.137189  |
| 36            | 6             | 0           | -4.000089               | 0.767177  | -0.925307 | 97            | 1             | 0           | -2.074003               | -2.739075 | 3.741458  |
| 37            | 6             | 0           | -4.695485               | -0.027369 | 0.017371  | 98            | 1             | 0           | -4.564008               | -2.906328 | 3.593348  |
| 38            | 6             | 0           | 1.536212                | -1.271507 | 1.006094  | 99            | 1             | 0           | -5.767670               | -1.635689 | 1.858688  |
| 39            | 6             | 0           | 1.771348                | -0.255065 | 1.984865  | 100           | 1             | 0           | -1.666162               | 1.603008  | 1.653712  |
| 40            | 6             | 0           | 2.889292                | -0.256665 | 2.767763  | 101           | 1             | 0           | -2.092959               | 3.555209  | 3.011257  |
| 41            | 6             | 0           | 3.857973                | -1.284953 | 2.635511  | 102           | 1             | 0           | -0.589373               | 5.549764  | 2.888241  |
| 42            | 6             | 0           | 3.643753                | -2.308505 | 1.761484  | 103           | 1             | 0           | 1.390284                | 5.491333  | 1.428470  |
| 43            | 6             | 0           | 2.467217                | -2.356169 | 0.947537  | 104           | 1             | 0           | 4.086415                | 7.510090  | -1.428374 |
| 44            | 6             | 0           | 4.206765                | -4.463687 | -1.014558 | 105           | 1             | 0           | 2.177040                | 4.893134  | -2.640247 |
| 45            | 6             | 0           | 5.151671                | -5.482445 | -1.119119 | 106           | 1             | 0           | 2.185647                | 6.661609  | -2.524440 |
| 46            | 6             | 0           | 4.224087                | -3.295821 | -1.968896 | 107           | 1             | 0           | 1.091223                | 5.699491  | -1.514816 |
| 47            | 6             | 0           | -2.556358               | -0.785629 | 0.974976  | 108           | 6             | 0           | -6.119234               | -0.033804 | 0.020402  |
| 48            | 6             | 0           | -1.905795               | -1.481872 | 2.037953  | 109           | 6             | 0           | -7.337929               | -0.035372 | 0.018917  |
| 49            | 6             | 0           | -2.605476               | -2.222731 | 2.948732  | 110           | 14            | 0           | -9.176420               | -0.018094 | -0.009334 |
| 50            | 6             | 0           | -4.016100               | -2.307322 | 2.873168  | 111           | 6             | 0           | -9.729920               | 0.076927  | -1.433539 |
| 51            | 6             | 0           | -4.684866               | -1.609234 | 1.910248  | 112           | 1             | 0           | -9.360878               | 2.099470  | -1.309498 |
| 52            | 6             | 0           | -3.985695               | -0.814143 | 0.955527  | 113           | 1             | 0           | -9.356906               | 0.696854  | -2.389277 |
| 53            | 6             | 0           | 0.101640                | 2.391187  | 0.656669  | 114           | 1             | 0           | -10.822837              | 1.117006  | -1.489261 |
| 54            | 6             | 0           | -1.000845               | 2.449633  | 1.567116  | 115           | 6             | 0           | -9.794007               | -1.775774 | -0.257618 |
| 55            | 6             | 0           | -1.240634               | 3.549095  | 2.339538  | 116           | 1             | 0           | -9.424701               | -2.192707 | -1.199121 |
| 56            | 6             | 0           | -0.383170               | 4.676508  | 2.277885  | 117           | 1             | 0           | -9.460764               | -2.429877 | 0.553579  |
| 57            | 6             | 0           | 0.710345                | 4.647120  | 1.465878  | 118           | 1             | 0           | -10.888634              | -1.799531 | -0.282611 |
| 58            | 6             | 0           | 1.001603                | 3.509132  | 0.647931  | 119           | 6             | 0           | -9.802033               | 0.668789  | 1.624491  |
| 59            | 6             | 0           | 3.152449                | 5.660608  | -0.875571 | 120           | 1             | 0           | -9.468840               | 0.053139  | 2.465222  |
| 60            | 6             | 0           | 4.111138                | 6.664342  | -0.744733 | 121           | 1             | 0           | -9.437457               | 1.687124  | 1.788072  |
| 61            | 6             | 0           | 2.095834                | 5.737832  | -1.948124 | 122           | 1             | 0           | -10.896838              | 0.694577  | 1.637441  |

**Table S2.** Cartesian Coordinates of **1''** (C<sub>48</sub>H<sub>35</sub>Si, total 84atoms) ( $\omega$ B97XD/6-31G\*\*).

| Center Number | Atomic Number | Atomic Type | Coordinates (Angstroms) |           |           | Center Number | Atomic Number | Atomic Type | Coordinates (Angstroms) |           |           |
|---------------|---------------|-------------|-------------------------|-----------|-----------|---------------|---------------|-------------|-------------------------|-----------|-----------|
|               |               |             | X                       | Y         | Z         |               |               |             | X                       | Y         | Z         |
| 1             | 6             | 0           | 1.322674                | 0.000209  | 0.000788  | 43            | 6             | 0           | 2.416349                | 3.562806  | 0.873687  |
| 2             | 6             | 0           | 2.065337                | -1.271729 | 0.002889  | 44            | 6             | 0           | -4.426821               | -0.017006 | 0.010441  |
| 3             | 6             | 0           | 1.704853                | -2.318193 | -0.898436 | 45            | 6             | 0           | -5.645324               | -0.019243 | 0.007491  |
| 4             | 6             | 0           | 0.696584                | -2.172547 | -1.903788 | 46            | 14            | 0           | -7.483927               | -0.000890 | -0.004764 |
| 5             | 6             | 0           | 0.376302                | -3.193747 | -2.751475 | 47            | 6             | 0           | -8.051417               | 1.616554  | -0.776395 |
| 6             | 6             | 0           | 1.046634                | -4.443163 | -2.675036 | 48            | 6             | 0           | -8.099815               | -1.458801 | -1.018542 |
| 7             | 6             | 0           | 2.050430                | -4.610886 | -1.770269 | 49            | 6             | 0           | -8.097964               | -0.132037 | 1.766828  |
| 8             | 6             | 0           | 2.424002                | -3.558576 | -0.878308 | 50            | 1             | 0           | 0.179998                | -1.229203 | -2.009906 |
| 9             | 6             | 0           | 3.504283                | -3.718901 | -0.012680 | 51            | 1             | 0           | -0.394816               | -3.043868 | -3.500138 |
| 10            | 6             | 0           | 2.060867                | 1.274664  | -0.005409 | 52            | 1             | 0           | 0.771590                | -5.247459 | -3.349544 |
| 11            | 6             | 0           | 3.149579                | 1.480982  | -0.904334 | 53            | 1             | 0           | 2.597544                | -5.547749 | -1.714456 |
| 12            | 6             | 0           | 3.511664                | 0.540602  | -1.920337 | 54            | 1             | 0           | 4.055194                | -4.656219 | -0.018332 |
| 13            | 6             | 0           | 4.556606                | 0.769146  | -2.768902 | 55            | 1             | 0           | 2.939630                | -0.369295 | -2.033102 |
| 14            | 6             | 0           | 5.319467                | 1.963579  | -2.681730 | 56            | 1             | 0           | 4.800047                | 0.031501  | -3.526722 |
| 15            | 6             | 0           | 4.978292                | 2.911736  | -1.765605 | 57            | 1             | 0           | 6.153342                | 2.124002  | -3.357338 |
| 16            | 6             | 0           | 3.879831                | 2.714243  | -0.873056 | 58            | 1             | 0           | 5.528511                | 3.846267  | -1.701830 |
| 17            | 6             | 0           | 3.491540                | 3.726708  | 0.002392  | 59            | 1             | 0           | 4.039323                | 4.665871  | 0.005121  |
| 18            | 6             | 0           | -0.139345               | -0.002639 | 0.004852  | 60            | 1             | 0           | 0.834517                | 1.603416  | -1.991685 |
| 19            | 6             | 0           | -0.874454               | 0.856640  | -0.874058 | 61            | 1             | 0           | -0.426783               | 3.067762  | -3.446934 |
| 20            | 6             | 0           | -0.237698               | 1.655364  | -1.873208 | 62            | 1             | 0           | -2.916063               | 3.213973  | -3.256039 |
| 21            | 6             | 0           | -0.948813               | 2.476382  | -2.701804 | 63            | 1             | 0           | -4.098174               | 1.772222  | -1.645044 |
| 22            | 6             | 0           | -2.359293               | 2.548920  | -2.603847 | 64            | 1             | 0           | 2.949220                | 0.375040  | 2.026077  |
| 23            | 6             | 0           | -3.015755               | 1.756249  | -1.708835 | 65            | 1             | 0           | 4.818732                | -0.019639 | 3.509954  |
| 24            | 6             | 0           | -2.304349               | 0.872802  | -0.844093 | 66            | 1             | 0           | 6.178180                | -2.107547 | 3.333259  |
| 25            | 6             | 0           | -3.002352               | -0.011776 | 0.010323  | 67            | 1             | 0           | 5.550537                | -3.831716 | 1.680802  |
| 26            | 6             | 0           | 3.159484                | -1.474412 | 0.896027  | 68            | 1             | 0           | 0.852449                | -1.599900 | 1.999379  |
| 27            | 6             | 0           | 3.523719                | -0.532920 | 1.910239  | 69            | 1             | 0           | -0.393941               | -3.068896 | 3.462728  |
| 28            | 6             | 0           | 4.573831                | -0.758026 | 2.753328  | 70            | 1             | 0           | -2.883209               | -3.229063 | 3.283771  |
| 29            | 6             | 0           | 5.340261                | -1.949859 | 2.662025  | 71            | 1             | 0           | -4.080535               | -1.797082 | 1.675126  |
| 30            | 6             | 0           | 4.997512                | -2.899052 | 1.747563  | 72            | 1             | 0           | 0.186057                | 1.225964  | 2.016963  |
| 31            | 6             | 0           | 3.893734                | -2.705187 | 0.860799  | 73            | 1             | 0           | -0.387067               | 3.038766  | 3.510165  |
| 32            | 6             | 0           | -0.865700               | -0.865142 | 0.887845  | 74            | 1             | 0           | 0.771199                | 5.246228  | 3.353473  |
| 33            | 6             | 0           | -0.219930               | -1.658467 | 1.885484  | 75            | 1             | 0           | 2.587546                | 5.552596  | 1.708846  |
| 34            | 6             | 0           | -0.922627               | -2.482052 | 2.718712  | 76            | 1             | 0           | -7.685536               | 2.474588  | -0.204790 |
| 35            | 6             | 0           | -2.333098               | -2.562702 | 2.627280  | 77            | 1             | 0           | -7.683839               | 1.713070  | -1.802466 |
| 36            | 6             | 0           | -2.997950               | -1.775768 | 1.733405  | 78            | 1             | 0           | -9.144878               | 1.669544  | -0.803678 |
| 37            | 6             | 0           | -2.295537               | -0.890200 | 0.863663  | 79            | 1             | 0           | -7.737189               | -1.402467 | -2.049080 |
| 38            | 6             | 0           | 1.701516                | 2.320007  | 0.897665  | 80            | 1             | 0           | -7.758535               | -2.407265 | -0.593442 |
| 39            | 6             | 0           | 0.698942                | 2.171027  | 1.908188  | 81            | 1             | 0           | -9.194590               | -1.474231 | -1.044913 |
| 40            | 6             | 0           | 0.379648                | 3.191191  | 2.757502  | 82            | 1             | 0           | -7.756821               | -1.060219 | 2.234995  |
| 41            | 6             | 0           | 1.045400                | 4.442833  | 2.677548  | 83            | 1             | 0           | -7.734016               | 0.703592  | 2.371728  |
| 42            | 6             | 0           | 2.043894                | 4.613896  | 1.767544  | 84            | 1             | 0           | -9.192611               | -0.121181 | 1.797570  |

**Table S3.** Cartesian Coordinates of 1'' dimer (acetylene-acetylene) (C<sub>96</sub>H<sub>70</sub>Si<sub>2</sub>, total 168 atoms) ( $\omega$ B97XD/6-31G\*\*).

| Center Number | Atomic Number | Atomic Type | Coordinates (Angstroms) |           |           | Center Number | Atomic Number | Atomic Type | Coordinates (Angstroms) |           |           |
|---------------|---------------|-------------|-------------------------|-----------|-----------|---------------|---------------|-------------|-------------------------|-----------|-----------|
|               |               |             | X                       | Y         | Z         |               |               |             | X                       | Y         | Z         |
| 1             | 6             | 0           | -1.175725               | 2.607849  | 0.928419  | 57            | 6             | 0           | -2.314216               | 4.618498  | -1.874196 |
| 2             | 6             | 0           | -0.704927               | 1.842471  | 2.019439  | 58            | 6             | 0           | -1.147561               | 4.920949  | -1.125083 |
| 3             | 6             | 0           | 0.377250                | 0.775360  | 1.886431  | 59            | 6             | 0           | -4.448714               | 5.337376  | -2.902883 |
| 4             | 6             | 0           | 1.147561                | 0.840189  | 0.578988  | 60            | 6             | 0           | -4.679316               | 4.076588  | -3.360686 |
| 5             | 6             | 0           | 0.649672                | 1.589575  | -0.491610 | 61            | 6             | 0           | -3.736172               | 3.047038  | -3.088196 |
| 6             | 6             | 0           | -0.300037               | 2.700675  | -0.271307 | 62            | 6             | 0           | -2.600994               | 3.306109  | -2.378741 |
| 7             | 6             | 0           | -0.101296               | 3.861900  | -0.968494 | 63            | 6             | 0           | 4.679316                | -4.076588 | -3.360686 |
| 8             | 6             | 0           | 2.301673                | 0.078171  | 0.394482  | 64            | 6             | 0           | 3.736172                | -3.047038 | -3.088196 |
| 9             | 6             | 0           | 2.849480                | -0.087508 | -0.870411 | 65            | 6             | 0           | 2.600994                | -3.306109 | -2.378741 |
| 10            | 6             | 0           | 2.224804                | 0.489878  | -1.971679 | 66            | 6             | 0           | 2.314216                | -4.618498 | -1.874196 |
| 11            | 6             | 0           | 1.145176                | 1.336202  | -1.775757 | 67            | 6             | 0           | 3.274666                | -5.648307 | -2.146599 |
| 12            | 6             | 0           | -2.340691               | 3.366162  | 1.121057  | 68            | 6             | 0           | 4.448714                | -5.337376 | -2.902883 |
| 13            | 6             | 0           | -2.966711               | 3.444780  | 2.355217  | 69            | 6             | 0           | 1.147561                | -4.920949 | -1.125083 |
| 14            | 6             | 0           | -2.413512               | 2.802954  | 3.456519  | 70            | 6             | 0           | 0.972390                | -6.222709 | -0.610199 |
| 15            | 6             | 0           | -1.293104               | 2.008465  | 3.276506  | 71            | 6             | 0           | 1.938486                | -7.244769 | -0.897361 |
| 16            | 6             | 0           | 1.317244                | 0.901535  | 2.995829  | 72            | 6             | 0           | 3.057562                | -6.937384 | -1.665199 |
| 17            | 6             | 0           | 2.159117                | 1.031438  | 3.860827  | 73            | 6             | 0           | -0.124194               | -6.573960 | 0.240002  |
| 18            | 6             | 0           | 1.175725                | -2.607849 | 0.928419  | 74            | 6             | 0           | -0.269762               | -7.838442 | 0.725932  |
| 19            | 6             | 0           | 0.704927                | -1.842471 | 2.019439  | 75            | 6             | 0           | 0.671830                | -8.856735 | 0.406137  |
| 20            | 6             | 0           | -0.377250               | -0.775360 | 1.886431  | 76            | 6             | 0           | 1.745153                | -8.563321 | -0.377001 |
| 21            | 6             | 0           | -1.147561               | -0.840189 | 0.578988  | 77            | 6             | 0           | -3.418450               | -3.880293 | 1.498281  |
| 22            | 6             | 0           | -0.649672               | -1.589575 | -0.491610 | 78            | 6             | 0           | -4.702845               | -4.160826 | 0.957636  |
| 23            | 6             | 0           | 0.300037                | -2.700675 | -0.271307 | 79            | 6             | 0           | -4.819115               | -4.475088 | -0.361138 |
| 24            | 6             | 0           | 0.101296                | -3.861900 | -0.968494 | 80            | 6             | 0           | -3.675638               | -4.503330 | -1.221374 |
| 25            | 6             | 0           | -2.301673               | -0.078171 | 0.394482  | 81            | 6             | 0           | -2.378988               | -4.184739 | -0.696460 |
| 26            | 6             | 0           | -2.849480               | 0.087508  | -0.870411 | 82            | 6             | 0           | -2.308080               | -3.899575 | 0.708810  |
| 27            | 6             | 0           | -2.224804               | -0.489878 | -1.971679 | 83            | 6             | 0           | -3.813748               | -4.839571 | -2.565079 |
| 28            | 6             | 0           | -1.145176               | -1.336202 | -1.775757 | 84            | 6             | 0           | -2.720820               | -4.842823 | -3.425965 |
| 29            | 6             | 0           | 2.340691                | -3.366162 | 1.121057  | 85            | 6             | 0           | -1.423734               | -4.484452 | -2.927655 |
| 30            | 6             | 0           | 2.966711                | -3.444780 | 2.355217  | 86            | 6             | 0           | -1.251152               | -4.169608 | -1.561462 |
| 31            | 6             | 0           | 2.413512                | -2.802954 | 3.456519  | 87            | 6             | 0           | -2.882738               | -5.164709 | -4.810379 |
| 32            | 6             | 0           | 1.293104                | -2.008465 | 3.276506  | 88            | 6             | 0           | -1.834156               | -5.099234 | -5.675301 |
| 33            | 6             | 0           | -1.317244               | -0.901535 | 2.995829  | 89            | 6             | 0           | -0.557537               | -4.688185 | -5.201329 |
| 34            | 6             | 0           | -2.159117               | -1.031438 | 3.860827  | 90            | 6             | 0           | -0.362799               | -4.391607 | -3.885040 |
| 35            | 6             | 0           | 1.834156                | 5.099234  | -5.675301 | 91            | 14            | 0           | 3.577871                | 0.954783  | 5.021800  |
| 36            | 6             | 0           | 0.557537                | 4.688185  | -5.201329 | 92            | 6             | 0           | 3.063427                | -0.066149 | 6.514812  |
| 37            | 6             | 0           | 0.362799                | 4.391607  | -3.885040 | 93            | 6             | 0           | 4.064723                | 2.690650  | 5.554055  |
| 38            | 6             | 0           | 1.423734                | 4.484452  | -2.927655 | 94            | 6             | 0           | 4.984265                | 0.122389  | 4.094719  |
| 39            | 6             | 0           | 2.720820                | 4.842823  | -3.425965 | 95            | 14            | 0           | -3.577871               | -0.954783 | 5.021800  |
| 40            | 6             | 0           | 2.882738                | 5.164709  | -4.810379 | 96            | 6             | 0           | -3.063427               | 0.066149  | 6.514812  |
| 41            | 6             | 0           | 1.251152                | 4.169608  | -1.561462 | 97            | 6             | 0           | -4.984265               | -0.122389 | 4.094719  |
| 42            | 6             | 0           | 2.378988                | 4.184739  | -0.696460 | 98            | 6             | 0           | -4.064723               | -2.690650 | 5.554055  |
| 43            | 6             | 0           | 3.675638                | 4.503330  | -1.221374 | 99            | 1             | 0           | 2.768818                | -0.397944 | 1.248142  |
| 44            | 6             | 0           | 3.813748                | 4.839571  | -2.565079 | 100           | 1             | 0           | 3.732726                | -0.705125 | -0.996225 |
| 45            | 6             | 0           | 2.308080                | 3.899575  | 0.708810  | 101           | 1             | 0           | 2.599344                | 0.315485  | -2.975488 |
| 46            | 6             | 0           | 3.418450                | 3.880293  | 1.498281  | 102           | 1             | 0           | 0.690634                | 1.833381  | -2.624409 |
| 47            | 6             | 0           | 4.702845                | 4.160826  | 0.957636  | 103           | 1             | 0           | -2.776899               | 3.902193  | 0.294980  |
| 48            | 6             | 0           | 4.819115                | 4.475088  | -0.361138 | 104           | 1             | 0           | -3.869617               | 4.038270  | 2.456826  |
| 49            | 6             | 0           | 0.269762                | 7.838442  | 0.725932  | 105           | 1             | 0           | -2.856872               | 2.906139  | 4.441972  |
| 50            | 6             | 0           | -0.671830               | 8.856735  | 0.406137  | 106           | 1             | 0           | -0.865866               | 1.485133  | 4.123119  |
| 51            | 6             | 0           | -1.745153               | 8.563321  | -0.377001 | 107           | 1             | 0           | -2.768818               | 0.397944  | 1.248142  |
| 52            | 6             | 0           | -1.938486               | 7.244769  | -0.897361 | 108           | 1             | 0           | -3.732726               | 0.705125  | -0.996225 |
| 53            | 6             | 0           | -0.972390               | 6.222709  | -0.610199 | 109           | 1             | 0           | -2.599344               | -0.315485 | -2.975488 |
| 54            | 6             | 0           | 0.124194                | 6.573960  | 0.240002  | 110           | 1             | 0           | -0.690634               | -1.833381 | -2.624409 |
| 55            | 6             | 0           | -3.057562               | 6.937384  | -1.665199 | 111           | 1             | 0           | 2.776899                | -3.902193 | 0.294980  |
| 56            | 6             | 0           | -3.274666               | 5.648307  | -2.146599 | 112           | 1             | 0           | 3.869617                | -4.038270 | 2.456826  |



| Center<br>Number | Atomic<br>Number | Atomic<br>Type | Coordinates (Angstroms) |           |           |
|------------------|------------------|----------------|-------------------------|-----------|-----------|
|                  |                  |                | X                       | Y         | Z         |
| 113              | 1                | 0              | 2.856872                | -2.906139 | 4.441972  |
| 114              | 1                | 0              | 0.865866                | -1.485133 | 4.123119  |
| 115              | 1                | 0              | 1.968768                | 5.341456  | -6.724565 |
| 116              | 1                | 0              | -0.270901               | 4.603261  | -5.897422 |
| 117              | 1                | 0              | -0.614223               | 4.062424  | -3.563882 |
| 118              | 1                | 0              | 3.871359                | 5.452969  | -5.156819 |
| 119              | 1                | 0              | 4.797634                | 5.093888  | -2.952024 |
| 120              | 1                | 0              | 1.350285                | 3.693822  | 1.167632  |
| 121              | 1                | 0              | 3.310974                | 3.640697  | 2.551449  |
| 122              | 1                | 0              | 5.578214                | 4.135357  | 1.598893  |
| 123              | 1                | 0              | 5.788095                | 4.709883  | -0.792891 |
| 124              | 1                | 0              | 1.110899                | 8.070903  | 1.371003  |
| 125              | 1                | 0              | -0.535096               | 9.859228  | 0.798659  |
| 126              | 1                | 0              | -2.482894               | 9.323678  | -0.617406 |
| 127              | 1                | 0              | 0.843413                | 5.817013  | 0.515904  |
| 128              | 1                | 0              | -3.784912               | 7.715907  | -1.882524 |
| 129              | 1                | 0              | -5.157877               | 6.136797  | -3.098630 |
| 130              | 1                | 0              | -5.575536               | 3.851698  | -3.929566 |
| 131              | 1                | 0              | -3.921867               | 2.040221  | -3.450240 |
| 132              | 1                | 0              | -1.906587               | 2.499400  | -2.178107 |
| 133              | 1                | 0              | 5.575536                | -3.851698 | -3.929566 |
| 134              | 1                | 0              | 3.921867                | -2.040221 | -3.450240 |
| 135              | 1                | 0              | 1.906587                | -2.499400 | -2.178107 |
| 136              | 1                | 0              | 5.157877                | -6.136797 | -3.098630 |
| 137              | 1                | 0              | 3.784912                | -7.715907 | -1.882524 |
| 138              | 1                | 0              | -0.843413               | -5.817013 | 0.515904  |
| 139              | 1                | 0              | -1.110899               | -8.070903 | 1.371003  |
| 140              | 1                | 0              | 0.535096                | -9.859228 | 0.798659  |
| 141              | 1                | 0              | 2.482894                | -9.323678 | -0.617406 |
| 142              | 1                | 0              | -3.310974               | -3.640697 | 2.551449  |
| 143              | 1                | 0              | -5.578214               | -4.135357 | 1.598893  |
| 144              | 1                | 0              | -5.788095               | -4.709883 | -0.792891 |
| 145              | 1                | 0              | -1.350285               | -3.693822 | 1.167632  |
| 146              | 1                | 0              | -4.797634               | -5.093888 | -2.952024 |
| 147              | 1                | 0              | -3.871359               | -5.452969 | -5.156819 |
| 148              | 1                | 0              | -1.968768               | -5.341456 | -6.724565 |
| 149              | 1                | 0              | 0.270901                | -4.603261 | -5.897422 |
| 150              | 1                | 0              | 0.614223                | -4.062424 | -3.563882 |
| 151              | 1                | 0              | 2.230730                | 0.404860  | 7.045722  |
| 152              | 1                | 0              | 3.894556                | -0.178024 | 7.218845  |
| 153              | 1                | 0              | 2.742842                | -1.067000 | 6.209318  |
| 154              | 1                | 0              | 4.885403                | 2.655952  | 6.278345  |
| 155              | 1                | 0              | 4.399613                | 3.287183  | 4.699726  |
| 156              | 1                | 0              | 3.224333                | 3.212905  | 6.020733  |
| 157              | 1                | 0              | 4.674003                | -0.867407 | 3.744806  |
| 158              | 1                | 0              | 5.266195                | 0.711887  | 3.216665  |
| 159              | 1                | 0              | 5.870211                | 0.004006  | 4.727179  |
| 160              | 1                | 0              | -3.894556               | 0.178024  | 7.218845  |
| 161              | 1                | 0              | -2.230730               | -0.404860 | 7.045722  |
| 162              | 1                | 0              | -2.742842               | 1.067000  | 6.209318  |
| 163              | 1                | 0              | -4.674003               | 0.867407  | 3.744806  |
| 164              | 1                | 0              | -5.870211               | -0.004006 | 4.727179  |
| 165              | 1                | 0              | -5.266195               | -0.711887 | 3.216665  |
| 166              | 1                | 0              | -4.399613               | -3.287183 | 4.699726  |
| 167              | 1                | 0              | -3.224333               | -3.212905 | 6.020733  |
| 168              | 1                | 0              | -4.885403               | -2.655952 | 6.278345  |

**Table S4.** Cartesian Coordinates of 1'' dimer (acetylene-allene) (C<sub>96</sub>H<sub>70</sub>Si<sub>2</sub>, total 168 atoms) (wB97XD/6-31G\*\*).

| Center Number | Atomic Number | Atomic Type | Coordinates (Angstroms) |           |           | Center Number | Atomic Number | Atomic Type | Coordinates (Angstroms) |           |           |
|---------------|---------------|-------------|-------------------------|-----------|-----------|---------------|---------------|-------------|-------------------------|-----------|-----------|
|               |               |             | X                       | Y         | Z         |               |               |             | X                       | Y         | Z         |
| 1             | 6             | 0           | -3.668842               | 1.523500  | 0.263677  | 57            | 6             | 0           | 7.488789                | -1.605772 | -0.760709 |
| 2             | 6             | 0           | -2.346758               | 1.146878  | 0.589599  | 58            | 6             | 0           | 6.483626                | -0.621006 | -0.892247 |
| 3             | 6             | 0           | -1.807198               | -0.151197 | 0.121426  | 59            | 6             | 0           | 9.453564                | -2.804110 | -1.675894 |
| 4             | 6             | 0           | -2.398387               | -0.677593 | -1.122883 | 60            | 6             | 0           | 9.538366                | -3.572224 | -0.556525 |
| 5             | 6             | 0           | -3.727400               | -0.337343 | -1.399060 | 61            | 6             | 0           | 8.576175                | -3.412313 | 0.480890  |
| 6             | 6             | 0           | -4.498424               | 0.491786  | -0.432729 | 62            | 6             | 0           | 7.601815                | -2.465616 | 0.383877  |
| 7             | 6             | 0           | -5.800389               | 0.197019  | -0.167377 | 63            | 6             | 0           | -8.079066               | 4.622200  | -1.605070 |
| 8             | 6             | 0           | -1.653317               | -1.413179 | -2.047517 | 64            | 6             | 0           | -7.058238               | 3.795269  | -2.152593 |
| 9             | 6             | 0           | -2.224898               | -1.812861 | -3.246270 | 65            | 6             | 0           | -6.628507               | 2.684103  | -1.491111 |
| 10            | 6             | 0           | -3.541535               | -1.458607 | -3.539215 | 66            | 6             | 0           | -7.178570               | 2.301940  | -0.220029 |
| 11            | 6             | 0           | -4.280640               | -0.720557 | -2.626667 | 67            | 6             | 0           | -8.197061               | 3.150315  | 0.328591  |
| 12            | 6             | 0           | -4.098862               | 2.796240  | 0.659103  | 68            | 6             | 0           | -8.626838               | 4.304143  | -0.401191 |
| 13            | 6             | 0           | -3.262439               | 3.660077  | 1.354000  | 69            | 6             | 0           | -6.754337               | 1.152423  | 0.492396  |
| 14            | 6             | 0           | -1.963629               | 3.278239  | 1.671792  | 70            | 6             | 0           | -7.305585               | 0.887156  | 1.765132  |
| 15            | 6             | 0           | -1.511228               | 2.028270  | 1.280444  | 71            | 6             | 0           | -8.325113               | 1.743767  | 2.301024  |
| 16            | 6             | 0           | -0.782087               | -0.740049 | 0.700580  | 72            | 6             | 0           | -8.754663               | 2.845021  | 1.566680  |
| 17            | 6             | 0           | 0.291263                | -1.283075 | 1.202751  | 73            | 6             | 0           | -6.868813               | -0.201553 | 2.584274  |
| 18            | 6             | 0           | 3.870833                | -1.930857 | 0.069575  | 74            | 6             | 0           | -7.417482               | -0.437601 | 3.809051  |
| 19            | 6             | 0           | 2.463666                | -1.927604 | 0.065242  | 75            | 6             | 0           | -8.448411               | 0.398743  | 4.320743  |
| 20            | 6             | 0           | 1.675078                | -0.781304 | 0.716980  | 76            | 6             | 0           | -8.882441               | 1.459562  | 3.587277  |
| 21            | 6             | 0           | 2.443925                | -0.212182 | 1.916387  | 77            | 6             | 0           | -4.076981               | -3.314749 | 1.625872  |
| 22            | 6             | 0           | 3.840485                | -0.299819 | 1.949577  | 78            | 6             | 0           | -4.606183               | -4.612018 | 1.383261  |
| 23            | 6             | 0           | 4.568670                | -0.798806 | 0.754295  | 79            | 6             | 0           | -5.676119               | -4.750539 | 0.556010  |
| 24            | 6             | 0           | 5.674306                | -0.156257 | 0.297564  | 80            | 6             | 0           | -6.276947               | -3.615545 | -0.076482 |
| 25            | 6             | 0           | 1.769390                | 0.382411  | 2.981721  | 81            | 6             | 0           | -5.735592               | -2.303031 | 0.139086  |
| 26            | 6             | 0           | 2.460787                | 0.828244  | 4.100941  | 82            | 6             | 0           | -4.606856               | -2.214449 | 1.022348  |
| 27            | 6             | 0           | 3.841152                | 0.667179  | 4.169948  | 83            | 6             | 0           | -7.391886               | -3.779135 | -0.891536 |
| 28            | 6             | 0           | 4.523197                | 0.109895  | 3.098096  | 84            | 6             | 0           | -7.989330               | -2.694244 | -1.524517 |
| 29            | 6             | 0           | 4.519942                | -2.996305 | -0.565494 | 85            | 6             | 0           | -7.453568               | -1.376896 | -1.331679 |
| 30            | 6             | 0           | 3.813724                | -4.003912 | -1.208774 | 86            | 6             | 0           | -6.339015               | -1.178582 | -0.483901 |
| 31            | 6             | 0           | 2.427012                | -3.969578 | -1.240565 | 87            | 6             | 0           | -9.118511               | -2.883552 | -2.381630 |
| 32            | 6             | 0           | 1.764269                | -2.929570 | -0.604689 | 88            | 6             | 0           | -9.679688               | -1.838026 | -3.047751 |
| 33            | 6             | 0           | 1.467951                | 0.231527  | -0.335053 | 89            | 6             | 0           | -9.126752               | -0.536400 | -2.900457 |
| 34            | 6             | 0           | 1.194808                | 0.986312  | -1.247363 | 90            | 6             | 0           | -8.060587               | -0.317898 | -2.079298 |
| 35            | 6             | 0           | 10.082417               | 1.663424  | 2.433045  | 91            | 14            | 0           | 0.085292                | -2.667522 | 2.495833  |
| 36            | 6             | 0           | 9.499893                | 0.373073  | 2.309734  | 92            | 6             | 0           | 1.727354                | -3.129940 | 3.284159  |
| 37            | 6             | 0           | 8.240680                | 0.224497  | 1.809489  | 93            | 6             | 0           | -0.626516               | -4.177711 | 1.622251  |
| 38            | 6             | 0           | 7.453289                | 1.335419  | 1.379592  | 94            | 6             | 0           | -1.110789               | -2.009881 | 3.792424  |
| 39            | 6             | 0           | 8.014120                | 2.637808  | 1.601545  | 95            | 14            | 0           | 0.693583                | 1.957902  | -2.731411 |
| 40            | 6             | 0           | 9.348629                | 2.760810  | 2.100876  | 96            | 6             | 0           | 1.038584                | 0.866779  | -4.222033 |
| 41            | 6             | 0           | 6.156380                | 1.190917  | 0.827080  | 97            | 6             | 0           | 1.697202                | 3.547528  | -2.829752 |
| 42            | 6             | 0           | 5.360204                | 2.356334  | 0.681248  | 98            | 6             | 0           | -1.133902               | 2.370862  | -2.608215 |
| 43            | 6             | 0           | 5.914756                | 3.652678  | 0.963435  | 99            | 1             | 0           | -0.610426               | -1.625596 | -1.836132 |
| 44            | 6             | 0           | 7.240811                | 3.768140  | 1.362168  | 100           | 1             | 0           | -1.637355               | -2.376934 | -3.963731 |
| 45            | 6             | 0           | 3.983068                | 2.328213  | 0.302208  | 101           | 1             | 0           | -3.987112               | -1.745206 | -4.486059 |
| 46            | 6             | 0           | 3.216786                | 3.451830  | 0.252836  | 102           | 1             | 0           | -5.297612               | -0.430565 | -2.867403 |
| 47            | 6             | 0           | 3.779308                | 4.730057  | 0.517574  | 103           | 1             | 0           | -5.090983               | 3.136323  | 0.410994  |
| 48            | 6             | 0           | 5.095626                | 4.821015  | 0.846894  | 104           | 1             | 0           | -3.630142               | 4.641665  | 1.634892  |
| 49            | 6             | 0           | 5.027266                | 1.453769  | -3.637349 | 105           | 1             | 0           | -1.300659               | 3.955982  | 2.199906  |
| 50            | 6             | 0           | 5.985646                | 1.262473  | -4.671092 | 106           | 1             | 0           | -0.483313               | 1.735227  | 1.467249  |
| 51            | 6             | 0           | 7.052765                | 0.444215  | -4.460535 | 107           | 1             | 0           | 0.689602                | 0.476876  | 2.943836  |
| 52            | 6             | 0           | 7.233991                | -0.222064 | -3.208306 | 108           | 1             | 0           | 1.918996                | 1.283564  | 4.923569  |
| 53            | 6             | 0           | 6.302478                | 0.011993  | -2.142722 | 109           | 1             | 0           | 4.387893                | 0.983448  | 5.052046  |
| 54            | 6             | 0           | 5.181796                | 0.857103  | -2.421164 | 110           | 1             | 0           | 5.600996                | -0.000937 | 3.142306  |
| 55            | 6             | 0           | 8.293874                | -1.103978 | -3.013138 | 111           | 1             | 0           | 5.594704                | -3.061969 | -0.553898 |
| 56            | 6             | 0           | 8.418514                | -1.826901 | -1.831076 | 112           | 1             | 0           | 4.357712                | -4.813211 | -1.684667 |

| Center<br>Number | Atomic<br>Number | Atomic<br>Type | Coordinates (Angstroms) |           |           |
|------------------|------------------|----------------|-------------------------|-----------|-----------|
|                  |                  |                | X                       | Y         | Z         |
| 113              | 1                | 0              | 1.861728                | -4.743954 | -1.748839 |
| 114              | 1                | 0              | 0.681290                | -2.895930 | -0.620068 |
| 115              | 1                | 0              | 11.091817               | 1.769047  | 2.817099  |
| 116              | 1                | 0              | 10.056159               | -0.503404 | 2.626784  |
| 117              | 1                | 0              | 7.809662                | -0.760971 | 1.771560  |
| 118              | 1                | 0              | 9.755937                | 3.760117  | 2.226817  |
| 119              | 1                | 0              | 7.665914                | 4.754387  | 1.531705  |
| 120              | 1                | 0              | 3.513497                | 1.387463  | 0.073225  |
| 121              | 1                | 0              | 2.165389                | 3.355749  | 0.003694  |
| 122              | 1                | 0              | 3.161011                | 5.619753  | 0.454686  |
| 123              | 1                | 0              | 5.552457                | 5.784924  | 1.053134  |
| 124              | 1                | 0              | 4.156566                | 2.073893  | -3.825006 |
| 125              | 1                | 0              | 5.850957                | 1.756012  | -5.628131 |
| 126              | 1                | 0              | 7.781239                | 0.266929  | -5.246715 |
| 127              | 1                | 0              | 4.420759                | 0.988985  | -1.666018 |
| 128              | 1                | 0              | 9.014420                | -1.258968 | -3.812435 |
| 129              | 1                | 0              | 10.162440               | -2.930524 | -2.489362 |
| 130              | 1                | 0              | 10.319881               | -4.318241 | -0.456994 |
| 131              | 1                | 0              | 8.615893                | -4.056650 | 1.353338  |
| 132              | 1                | 0              | 6.860387                | -2.381423 | 1.171812  |
| 133              | 1                | 0              | -8.410434               | 5.501549  | -2.147470 |
| 134              | 1                | 0              | -6.613412               | 4.055789  | -3.107646 |
| 135              | 1                | 0              | -5.838960               | 2.080269  | -1.922819 |
| 136              | 1                | 0              | -9.403314               | 4.925367  | 0.036352  |
| 137              | 1                | 0              | -9.533032               | 3.486346  | 1.973025  |
| 138              | 1                | 0              | -6.076213               | -0.843888 | 2.232113  |
| 139              | 1                | 0              | -7.059101               | -1.271281 | 4.404321  |
| 140              | 1                | 0              | -8.875865               | 0.192452  | 5.296643  |
| 141              | 1                | 0              | -9.658713               | 2.117931  | 3.966925  |
| 142              | 1                | 0              | -3.236917               | -3.199098 | 2.301724  |
| 143              | 1                | 0              | -4.157684               | -5.476743 | 1.861327  |
| 144              | 1                | 0              | -6.104441               | -5.729492 | 0.359965  |
| 145              | 1                | 0              | -4.167506               | -1.247771 | 1.231738  |
| 146              | 1                | 0              | -7.800127               | -4.775585 | -1.042121 |
| 147              | 1                | 0              | -9.511648               | -3.890004 | -2.494969 |
| 148              | 1                | 0              | -10.533897              | -1.992790 | -3.698876 |
| 149              | 1                | 0              | -9.555073               | 0.294393  | -3.452193 |
| 150              | 1                | 0              | -7.658036               | 0.680269  | -2.007396 |
| 151              | 1                | 0              | 2.133364                | -2.319384 | 3.895074  |
| 152              | 1                | 0              | 1.588002                | -4.007241 | 3.925577  |
| 153              | 1                | 0              | 2.471074                | -3.385890 | 2.523355  |
| 154              | 1                | 0              | 0.157853                | -4.697789 | 1.064027  |
| 155              | 1                | 0              | -1.048912               | -4.884946 | 2.344612  |
| 156              | 1                | 0              | -1.417015               | -3.899723 | 0.918493  |
| 157              | 1                | 0              | -0.619629               | -1.250555 | 4.409384  |
| 158              | 1                | 0              | -1.464424               | -2.804696 | 4.457202  |
| 159              | 1                | 0              | -1.982477               | -1.540522 | 3.324615  |
| 160              | 1                | 0              | 0.802473                | 1.388110  | -5.155700 |
| 161              | 1                | 0              | 2.089587                | 0.562882  | -4.253141 |
| 162              | 1                | 0              | 0.424952                | -0.038350 | -4.174949 |
| 163              | 1                | 0              | 1.607089                | 3.986875  | -3.829153 |
| 164              | 1                | 0              | 1.334245                | 4.286788  | -2.108938 |
| 165              | 1                | 0              | 2.757480                | 3.381263  | -2.619019 |
| 166              | 1                | 0              | -1.748562               | 1.468830  | -2.677504 |
| 167              | 1                | 0              | -1.424432               | 3.044388  | -3.421915 |
| 168              | 1                | 0              | -1.367324               | 2.862456  | -1.658434 |

**Table S5.** Cartesian Coordinates of 1'' dimer (allene-allene) (C<sub>96</sub>H<sub>70</sub>Si<sub>2</sub>, total 168 atoms) (ωB97XD/6-31G\*\*).

| Center Number | Atomic Number | Atom Type | Coordinates (Angstroms) |           |           | Center Number | Atomic Number | Atom Type | Coordinates (Angstroms) |           |           |
|---------------|---------------|-----------|-------------------------|-----------|-----------|---------------|---------------|-----------|-------------------------|-----------|-----------|
|               |               |           | X                       | Y         | Z         |               |               |           | X                       | Y         | Z         |
| 1             | 6             | 0         | -4.744103               | 1.373763  | -1.311851 | 57            | 6             | 0         | -4.815453               | -3.250864 | -0.992794 |
| 2             | 6             | 0         | -3.764106               | 2.379399  | -1.246922 | 58            | 6             | 0         | -4.478336               | -2.273969 | -0.029208 |
| 3             | 6             | 0         | -2.364811               | 1.930075  | -1.080209 | 59            | 6             | 0         | -4.723182               | -5.586996 | -1.813817 |
| 4             | 6             | 0         | -2.045320               | 0.644787  | -1.751672 | 60            | 6             | 0         | -5.479802               | -5.263780 | -2.896419 |
| 5             | 6             | 0         | -3.037202               | -0.352154 | -1.825993 | 61            | 6             | 0         | -5.909662               | -3.917913 | -3.077755 |
| 6             | 6             | 0         | -4.316356               | -0.039300 | -1.103380 | 62            | 6             | 0         | -5.587597               | -2.955564 | -2.169453 |
| 7             | 6             | 0         | -4.930063               | -0.842051 | -0.190442 | 63            | 6             | 0         | -0.125637               | -1.816443 | 0.148399  |
| 8             | 6             | 0         | -0.801401               | 0.462046  | -2.354265 | 64            | 6             | 0         | 0.620091                | -0.608495 | 0.212348  |
| 9             | 6             | 0         | -0.513203               | -0.705516 | -3.042970 | 65            | 6             | 0         | 1.962224                | -0.589858 | -0.011116 |
| 10            | 6             | 0         | -1.495474               | -1.680486 | -3.155789 | 66            | 6             | 0         | 2.694421                | -1.782689 | -0.322757 |
| 11            | 6             | 0         | -2.740426               | -1.503467 | -2.561692 | 67            | 6             | 0         | 1.926399                | -2.995647 | -0.409905 |
| 12            | 6             | 0         | -6.077134               | 1.731532  | -1.510173 | 68            | 6             | 0         | 0.516245                | -2.972832 | -0.157815 |
| 13            | 6             | 0         | -6.439653               | 3.069048  | -1.607946 | 69            | 6             | 0         | 4.098062                | -1.817146 | -0.528338 |
| 14            | 6             | 0         | -5.470289               | 4.064273  | -1.504475 | 70            | 6             | 0         | 4.699711                | -3.035151 | -0.926375 |
| 15            | 6             | 0         | -4.136009               | 3.719660  | -1.329902 | 71            | 6             | 0         | 3.919154                | -4.235524 | -1.014547 |
| 16            | 6             | 0         | -1.416388               | 2.566782  | -0.421816 | 72            | 6             | 0         | 2.557413                | -4.191094 | -0.732217 |
| 17            | 6             | 0         | -0.341068               | 3.057913  | 0.138881  | 73            | 6             | 0         | 6.072594                | -3.131730 | -1.313358 |
| 18            | 6             | 0         | 5.121322                | 1.938062  | -0.286023 | 74            | 6             | 0         | 6.634647                | -4.313462 | -1.696704 |
| 19            | 6             | 0         | 4.170379                | 2.967654  | -0.453296 | 75            | 6             | 0         | 5.865478                | -5.508231 | -1.726744 |
| 20            | 6             | 0         | 2.944700                | 2.705439  | -1.239550 | 76            | 6             | 0         | 4.544331                | -5.461710 | -1.401438 |
| 21            | 6             | 0         | 3.074704                | 1.703089  | -2.317814 | 77            | 6             | 0         | 9.217771                | -0.580654 | -0.717790 |
| 22            | 6             | 0         | 3.990683                | 0.660722  | -2.115481 | 78            | 6             | 0         | 10.081825               | -0.993968 | 0.335630  |
| 23            | 6             | 0         | 4.753418                | 0.595151  | -0.838693 | 79            | 6             | 0         | 9.558866                | -1.295128 | 1.554717  |
| 24            | 6             | 0         | 4.927883                | -0.591376 | -0.198831 | 80            | 6             | 0         | 8.151020                | -1.211522 | 1.800947  |
| 25            | 6             | 0         | 2.334236                | 1.767304  | -3.498145 | 81            | 6             | 0         | 7.266783                | -0.840945 | 0.733450  |
| 26            | 6             | 0         | 2.504012                | 0.805649  | -4.484865 | 82            | 6             | 0         | 7.870519                | -0.511053 | -0.527532 |
| 27            | 6             | 0         | 3.433801                | -0.217007 | -4.302879 | 83            | 6             | 0         | 7.633828                | -1.472160 | 3.066385  |
| 28            | 6             | 0         | 4.173813                | -0.283395 | -3.129980 | 84            | 6             | 0         | 6.274028                | -1.335050 | 3.331505  |
| 29            | 6             | 0         | 6.285294                | 2.242107  | 0.429639  | 85            | 6             | 0         | 5.379078                | -0.974653 | 2.269848  |
| 30            | 6             | 0         | 6.489029                | 3.500622  | 0.981468  | 86            | 6             | 0         | 5.871729                | -0.778561 | 0.961090  |
| 31            | 6             | 0         | 5.533273                | 4.498761  | 0.831505  | 87            | 6             | 0         | 5.756950                | -1.537488 | 4.649683  |
| 32            | 6             | 0         | 4.384246                | 4.229083  | 0.104492  | 88            | 6             | 0         | 4.433568                | -1.365844 | 4.918688  |
| 33            | 6             | 0         | 1.795660                | 3.297760  | -0.982857 | 89            | 6             | 0         | 3.546855                | -0.972282 | 3.878013  |
| 34            | 6             | 0         | 0.621696                | 3.818879  | -0.745736 | 90            | 6             | 0         | 4.002417                | -0.786827 | 2.607499  |
| 35            | 6             | 0         | -9.898173               | -1.989330 | 1.119507  | 91            | 14            | 0         | 0.024755                | 2.857314  | 1.996430  |
| 36            | 6             | 0         | -8.963732               | -2.511168 | 0.185288  | 92            | 6             | 0         | -0.883383               | 1.352825  | 2.685654  |
| 37            | 6             | 0         | -7.713358               | -1.980427 | 0.071751  | 93            | 6             | 0         | 1.866673                | 2.644591  | 2.281396  |
| 38            | 6             | 0         | -7.268305               | -0.885238 | 0.878003  | 94            | 6             | 0         | -0.546103               | 4.452877  | 2.821748  |
| 39            | 6             | 0         | -8.232186               | -0.354465 | 1.803977  | 95            | 14            | 0         | 0.076122                | 5.389043  | -1.649626 |
| 40            | 6             | 0         | -9.534925               | -0.937619 | 1.901188  | 96            | 6             | 0         | -0.900856               | 4.868879  | -3.171037 |
| 41            | 6             | 0         | -5.976101               | -0.306457 | 0.774224  | 97            | 6             | 0         | 1.611861                | 6.344775  | -2.158725 |
| 42            | 6             | 0         | -5.663249               | 0.797692  | 1.616348  | 98            | 6             | 0         | -0.993043               | 6.393424  | -0.472244 |
| 43            | 6             | 0         | -6.649448               | 1.331604  | 2.513308  | 99            | 1             | 0         | -0.053811               | 1.244324  | -2.271294 |
| 44            | 6             | 0         | -7.904744               | 0.742383  | 2.590358  | 100           | 1             | 0         | 0.468882                | -0.842467 | -3.483609 |
| 45            | 6             | 0         | -4.386536               | 1.445830  | 1.636777  | 101           | 1             | 0         | -1.300934               | -2.592122 | -3.711483 |
| 46            | 6             | 0         | -4.131232               | 2.532118  | 2.416562  | 102           | 1             | 0         | -3.484137               | -2.270190 | -2.701731 |
| 47            | 6             | 0         | -5.127639               | 3.069630  | 3.273864  | 103           | 1             | 0         | -6.833548               | 0.955095  | -1.564021 |
| 48            | 6             | 0         | -6.347073               | 2.471127  | 3.324582  | 104           | 1             | 0         | -7.480506               | 3.335660  | -1.759031 |
| 49            | 6             | 0         | -2.394841               | -2.063769 | 3.071277  | 105           | 1             | 0         | -5.753569               | 5.109736  | -1.571545 |
| 50            | 6             | 0         | -1.884753               | -3.387747 | 3.156859  | 106           | 1             | 0         | -3.373421               | 4.489630  | -1.262304 |
| 51            | 6             | 0         | -2.269596               | -4.317654 | 2.240467  | 107           | 1             | 0         | 1.629462                | 2.582063  | -3.637030 |
| 52            | 6             | 0         | -3.164110               | -3.981378 | 1.176458  | 108           | 1             | 0         | 1.923964                | 0.862105  | -5.400351 |
| 53            | 6             | 0         | -3.663256               | -2.639927 | 1.066786  | 109           | 1             | 0         | 3.587923                | -0.959436 | -5.078974 |
| 54            | 6             | 0         | -3.251147               | -1.708185 | 2.072000  | 110           | 1             | 0         | 4.900419                | -1.077257 | -2.995568 |
| 55            | 6             | 0         | -3.539025               | -4.934466 | 0.233007  | 111           | 1             | 0         | 7.056959                | 1.500231  | 0.554686  |
| 56            | 6             | 0         | -4.358540               | -4.602013 | -0.840026 | 112           | 1             | 0         | 7.406454                | 3.697457  | 1.526519  |

| Center<br>Number | Atomic<br>Number | Atomic<br>Type | Coordinates (Angstroms) |           |           |
|------------------|------------------|----------------|-------------------------|-----------|-----------|
|                  |                  |                | X                       | Y         | Z         |
| 113              | 1                | 0              | 5.690683                | 5.483771  | 1.258837  |
| 114              | 1                | 0              | 3.635311                | 4.999955  | -0.051786 |
| 115              | 1                | 0              | -10.888896              | -2.424531 | 1.200256  |
| 116              | 1                | 0              | -9.245746               | -3.344961 | -0.449981 |
| 117              | 1                | 0              | -7.045499               | -2.412355 | -0.650063 |
| 118              | 1                | 0              | -10.230602              | -0.511014 | 2.618367  |
| 119              | 1                | 0              | -8.645179               | 1.149586  | 3.274572  |
| 120              | 1                | 0              | -3.593574               | 1.068427  | 1.008592  |
| 121              | 1                | 0              | -3.147970               | 2.988218  | 2.380151  |
| 122              | 1                | 0              | -4.907822               | 3.938032  | 3.886158  |
| 123              | 1                | 0              | -7.125232               | 2.847566  | 3.982550  |
| 124              | 1                | 0              | -2.095107               | -1.321916 | 3.804482  |
| 125              | 1                | 0              | -1.193621               | -3.650702 | 3.950716  |
| 126              | 1                | 0              | -1.895121               | -5.336099 | 2.292572  |
| 127              | 1                | 0              | -3.621490               | -0.696427 | 2.040296  |
| 128              | 1                | 0              | -3.173067               | -5.953797 | 0.329672  |
| 129              | 1                | 0              | -4.372000               | -6.604517 | -1.667037 |
| 130              | 1                | 0              | -5.747833               | -6.018715 | -3.628095 |
| 131              | 1                | 0              | -6.490669               | -3.654954 | -3.955818 |
| 132              | 1                | 0              | -5.896059               | -1.930605 | -2.343970 |
| 133              | 1                | 0              | -1.196697               | -1.799881 | 0.312648  |
| 134              | 1                | 0              | 0.102582                | 0.322548  | 0.405681  |
| 135              | 1                | 0              | 2.478881                | 0.358624  | 0.033515  |
| 136              | 1                | 0              | -0.035753               | -3.905924 | -0.228714 |
| 137              | 1                | 0              | 1.971491                | -5.105831 | -0.780925 |
| 138              | 1                | 0              | 6.678931                | -2.240321 | -1.326991 |
| 139              | 1                | 0              | 7.679978                | -4.338543 | -1.988046 |
| 140              | 1                | 0              | 6.328536                | -6.443617 | -2.023952 |
| 141              | 1                | 0              | 3.930909                | -6.357659 | -1.440897 |
| 142              | 1                | 0              | 9.638796                | -0.311861 | -1.681329 |
| 143              | 1                | 0              | 11.151494               | -1.053865 | 0.163853  |
| 144              | 1                | 0              | 10.203957               | -1.595945 | 2.375492  |
| 145              | 1                | 0              | 7.233528                | -0.171168 | -1.336807 |
| 146              | 1                | 0              | 8.307743                | -1.764048 | 3.868196  |
| 147              | 1                | 0              | 6.451317                | -1.821878 | 5.435331  |
| 148              | 1                | 0              | 4.053004                | -1.516311 | 5.923873  |
| 149              | 1                | 0              | 2.495790                | -0.812708 | 4.097743  |
| 150              | 1                | 0              | 3.310959                | -0.473945 | 1.840453  |
| 151              | 1                | 0              | -0.176736               | 0.533495  | 2.850077  |
| 152              | 1                | 0              | -1.371180               | 1.581793  | 3.638275  |
| 153              | 1                | 0              | -1.651658               | 0.979606  | 2.004018  |
| 154              | 1                | 0              | 2.058710                | 2.532942  | 3.354429  |
| 155              | 1                | 0              | 2.450525                | 3.496003  | 1.922594  |
| 156              | 1                | 0              | 2.251466                | 1.747778  | 1.787695  |
| 157              | 1                | 0              | 0.027785                | 5.302944  | 2.438321  |
| 158              | 1                | 0              | -0.396122               | 4.409787  | 3.905583  |
| 159              | 1                | 0              | -1.604106               | 4.658422  | 2.631732  |
| 160              | 1                | 0              | -0.245468               | 4.364706  | -3.888895 |
| 161              | 1                | 0              | -1.705888               | 4.173419  | -2.916637 |
| 162              | 1                | 0              | -1.344208               | 5.735086  | -3.673486 |
| 163              | 1                | 0              | 2.309781                | 5.697429  | -2.699486 |
| 164              | 1                | 0              | 1.355903                | 7.185398  | -2.811491 |
| 165              | 1                | 0              | 2.136165                | 6.745626  | -1.285476 |
| 166              | 1                | 0              | -0.397619               | 6.787952  | 0.357276  |
| 167              | 1                | 0              | -1.787631               | 5.775156  | -0.042706 |
| 168              | 1                | 0              | -1.460055               | 7.241068  | -0.983826 |
